# Supplementary material for: Marine-Inspired Bis-indoles Possessing Antiproliferative Activity against Breast Cancer; Design, Synthesis, and Biological Evaluation
Source: MDPI journal article supplement (doi:10.3390/md18040190), 2020-04-02

## **Supporting Information**

### **Marine-Inspired Bis-indoles Possessing Anti-proliferative Activity against Breast Cancer; Design, Synthesis and Biological Evaluation**

**Wagdy M. Eldehna, Ghada S. Hassan, Sara T. Al-Rashood, Hamad M. Alkahtani, Abdulrahman A. Almehizia, Ghada H. Al-Ansary**

|                                                                     |             |
|---------------------------------------------------------------------|-------------|
| <b>1. Anti-proliferative action toward human breast cell lines.</b> | <b>2</b>    |
| <b>2. Cell Cycle Analysis.</b>                                      | <b>2</b>    |
| <b>3. ELISA Immunoassay.</b>                                        | <b>3</b>    |
| <b>4. Annexin V-FITC Apoptosis Assay.</b>                           | <b>3</b>    |
| <b>5. CDK2 kinase inhibitory activity.</b>                          | <b>4</b>    |
| <b>6. Representative Mass, NMR and IR spectra.</b>                  | <b>5-36</b> |

## Biological Evaluations

### 1. Anti-proliferative action toward human breast cell lines

The two examined human breast cancer cell lines (MCF-7 and Breast MDA-MB-231), and non-tumorigenic human breast epithelial cell line (MCF-10A) have been obtained from American Type Culture Collection (ATCC). The cells were maintained in Dulbecco's modified Eagle's medium (DMEM) supplemented with 10% heat inactivated fetal calf serum (GIBCO), penicillin (100 U/ml) and streptomycin (100 µg/ml) at 37 °C in humidified atmosphere containing 5% CO<sub>2</sub>. Cells at a concentration of  $0.50 \times 10^6$  were grown in a 25 cm<sup>2</sup> flask in 5 ml of culture medium.

The anti-proliferative activity of the tested compounds was measured *in vitro* using the Sulfo-Rhodamine-B stain (SRB) assay. Briefly, Cells were inoculated in 96-well microtiter plate ( $5 \times 10^4$  cells/ well) for 24 h before treatment with the tested compounds to allow attachment of cell to the wall of the plate. Tested compounds were dissolved in DMSO at 1 mg/ml immediately before use and diluted to the appropriate volume just before addition to the cell culture. Different concentrations of tested compounds, doxorubicin and sorafenib were added to the cells (three wells were prepared for each individual dose). Cells were incubated with the compounds for 48 h at 37°C and in atmosphere of 5% CO<sub>2</sub>. After 48 h cells were fixed, washed, and stained for 30 min with 0.4% (w/v) SRB dissolved in 1% acetic acid. Unbound dye was removed by four washes with 1% acetic acid, and attached stain was recovered with Tris-EDTA buffer. Color intensity was measured in an ELISA reader. The relation between percent of surviving fraction and drug concentration is plotted to get the survival curve for each cell line. The concentration required for 50% inhibition of cell viability (IC<sub>50</sub>) was calculated.

### 2. Cell Cycle Analysis

Breast cancer MCF-7 cells were treated with bis-indoles **7e** and **9a** for 24 h (at their IC<sub>50</sub> concentration), and then cells were washed twice with ice-cold phosphate buffered saline (PBS). Subsequently, the treated cells were collected by centrifugation, fixed in ice-cold 70% (*v/v*) ethanol, washed with PBS, re-suspended with 100 µg/mL RNase, stained with 40 µg/mL PI, and analyzed by flow cytometry using FACS Calibur (Becton Dickinson, BD, Franklin Lakes, NJ, USA). The cell cycle distributions were calculated using CellQuest software 5.1 (Becton Dickinson).

### 3. ELISA Immunoassay

The levels of the pro-apoptotic markers (Bax, caspase-3 and p53) as well as the anti-apoptotic marker Bcl-2 were determined using ELISA colorimetric kits per the manufacturer's instructions. Breast cancer MCF-7 cells were cultured as a monolayer in T-25 flasks and were seeded to attain 30% confluency prior to treatment. Cells were then treated separately with bis-indoles **7e** and **9a** at their IC<sub>50</sub> concentrations for 48 h. At the end of treatment, cells were collected via trypsinization and centrifuged at 10,000 rpm. The pellet was then rinsed with PBS and lysed in RIPA lysis buffer at 4 °C for 45 min, then centrifuged at 14,000 rpm for 20 min to remove the cellular debris. Lysates were then collected and stored at -80 °C for later protein determination using Pierce BCA Protein Assay Kit according to manufacturer's recommendations.

The cell lysate was diluted 10 times, and 100 µL (50 mg protein) was added to the wells of four separate microtiter plates for the four ELISA kits that were pre-coated with primary antibodies specific to Bax, Bcl-2, caspase-3 and p53 proteins, respectively. A secondary biotin-linked antibody specific to the protein captured by the primary antibody was further added to bind the captured protein, forming a "sandwich" of specific antibodies around the desired protein in the cell lysate. The streptavidin-HRP complex was then used to bind the biotin-linked secondary antibody through its streptavidin portion. The HRP domain reacted with the added TMB substrate to form a colored product that measured at 450 nm by a plate reader ChroMate-4300 after the reaction was terminated *via* the addition of stop solution.

### 4. Annexin V-FITC Apoptosis Assay

Phosphatidylserine externalization was assayed using Annexin V-FITC/PI apoptosis detection kit (BD Biosciences, USA) according to the manufacturer's instructions. Breast cancer MCF-7 cells were cultured to a monolayer then treated with bis-indoles **7e** and **9a** at their IC<sub>50</sub> concentration. Briefly, cells were then harvested *via* trypsinization, and rinsed twice in PBS followed by binding buffer. Moreover, cells were re-suspended in 100 µL of binding buffer with the addition of 1 µL of FITC-Annexin V followed by an incubation period of 30 min at 4 °C. Cells were then rinsed in binding buffer and resuspended in 150 µL of binding buffer with the addition of 1 µL of DAPI (1 µg/µL in PBS). Cells were then analyzed using the flow cytometer BD FACS Canto II and the results were interpreted with FlowJo7.6.4 software (Tree Star, Ashland, OR, USA).

## 5. CDK2 kinase inhibitory activity

Reaction Biology Corp. Kinase HotSpotSM service (<http://www.reactionbiology.com>) was used for screening of tested compounds. CDK2 Kinase inhibitory activity was assessed by the HotSpot assay platform, which contained specific kinase/substrate pairs along with required cofactors. Base reaction buffer: 20 mM Hepes (pH 7.5), 10 mM MgCl<sub>2</sub>, 1 mM EGTA, 0.02% Brij35, 0.02 mg/ml BSA, 0.1 mM Na<sub>3</sub>VO<sub>4</sub>, 2 mM DTT, 1% DMSO. Testing compounds were dissolved in 100% DMSO to specific concentration. The serial dilution was conducted by Integra Viaflo Assist in DMSO. The reaction mixture containing the examined compound and <sup>33</sup>P-ATP was incubated at room temperature for 2 h and radioactivity was detected by filter-binding method. Kinase activity data were expressed as the percent remaining kinase activity in test samples compared to vehicle (dimethyl sulfoxide) reactions.

WAGDY-ELDOHNA-3h-5f#168 RT: 2.83 AV: 1 SB: 2 3.05, 3.05 NL: 9.73E4  
T: {0,0} + c EIFull ms[40.00-1000.00]

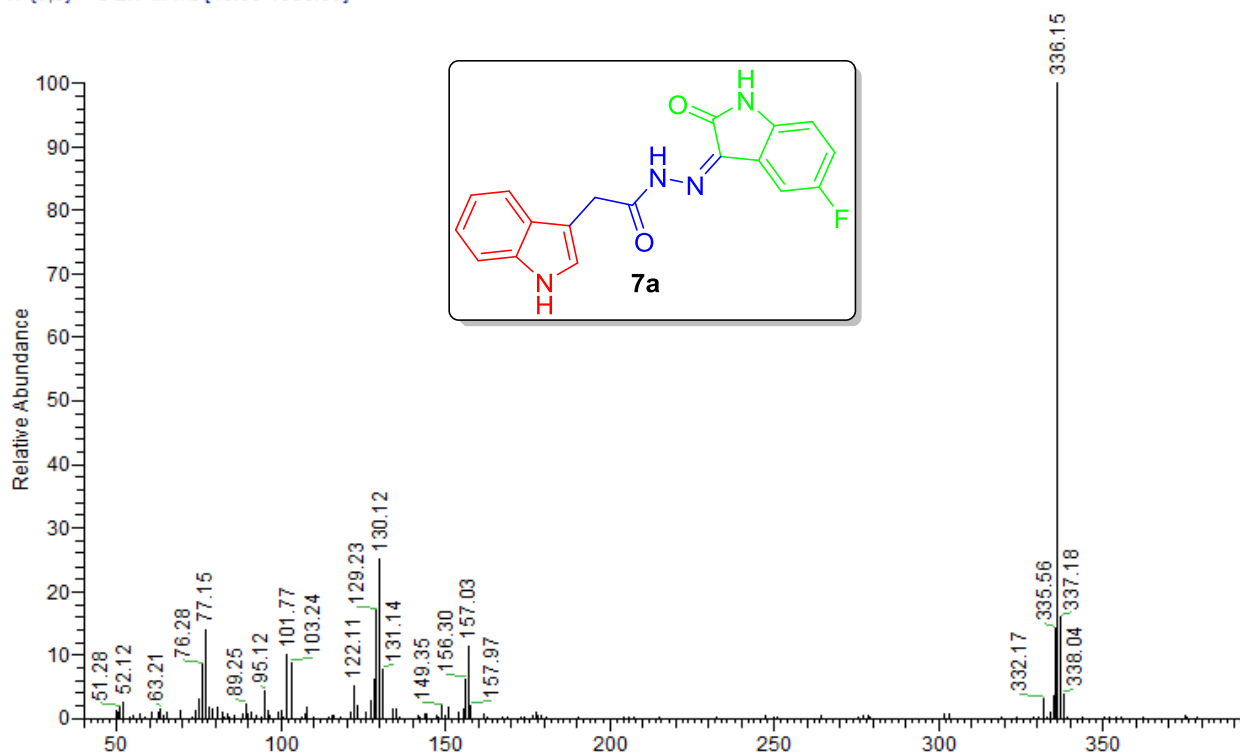

WAGDY-ELDOHNA-3H-5ME #183 RT: 3.08 AV: 1 SB: 2 3.36, 3.36 NL: 7.87E4  
T: {0,0} + c EIFull ms[40.00-1000.00]

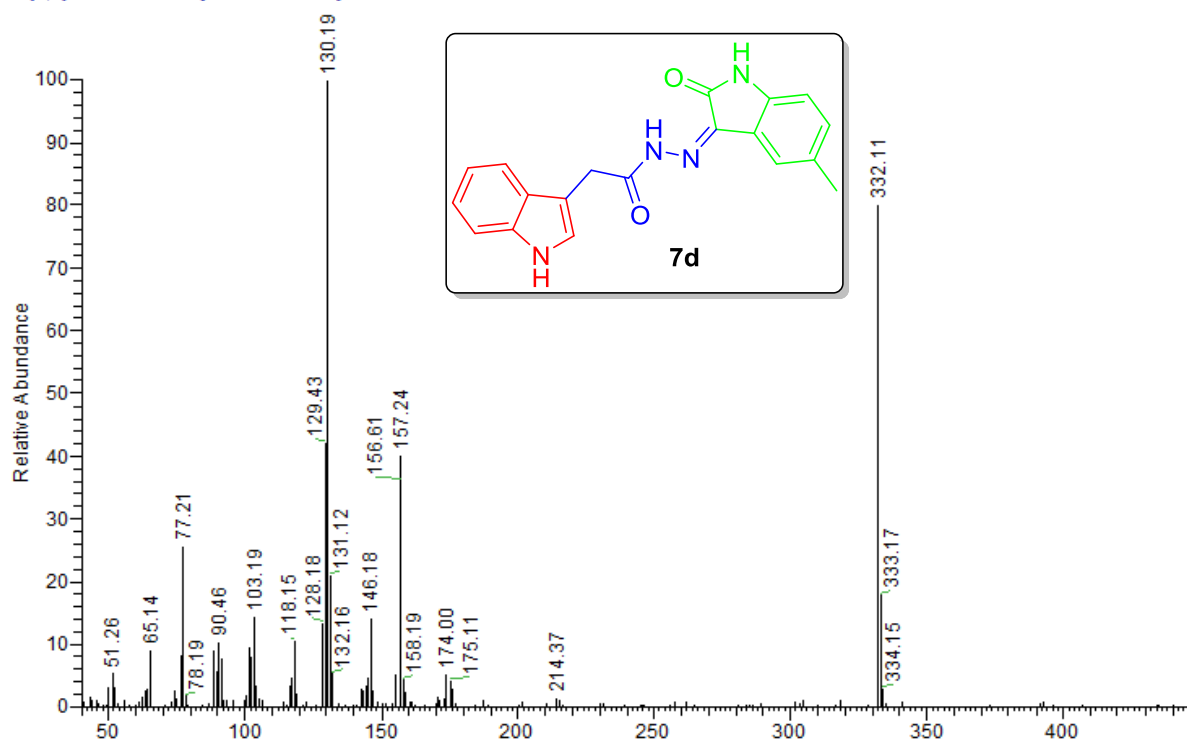

WAGDY-ELDOHNA-3h-isobuty #149 RT: 2.51 AV: 1 SB: 2 3.38, 3.38 NL: 5.92E4  
T: {0,0} + cEI Full ms [40.00-1000.00]

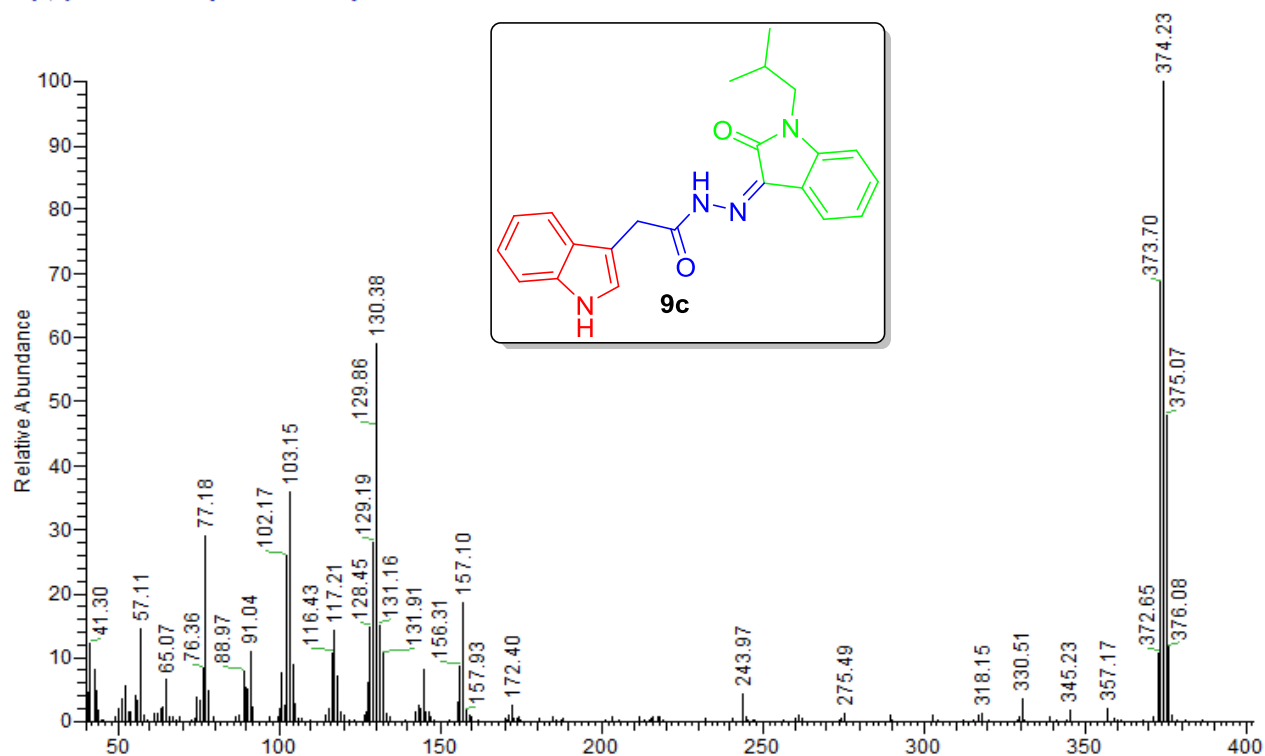

WAGDY-ELDOHNA-3H-NBZ #168 RT: 2.83 AV: 1 SB: 2 4.45, 4.45 NL: 1.54E5  
T: {0,0} + cEI Full ms [40.00-1000.00]

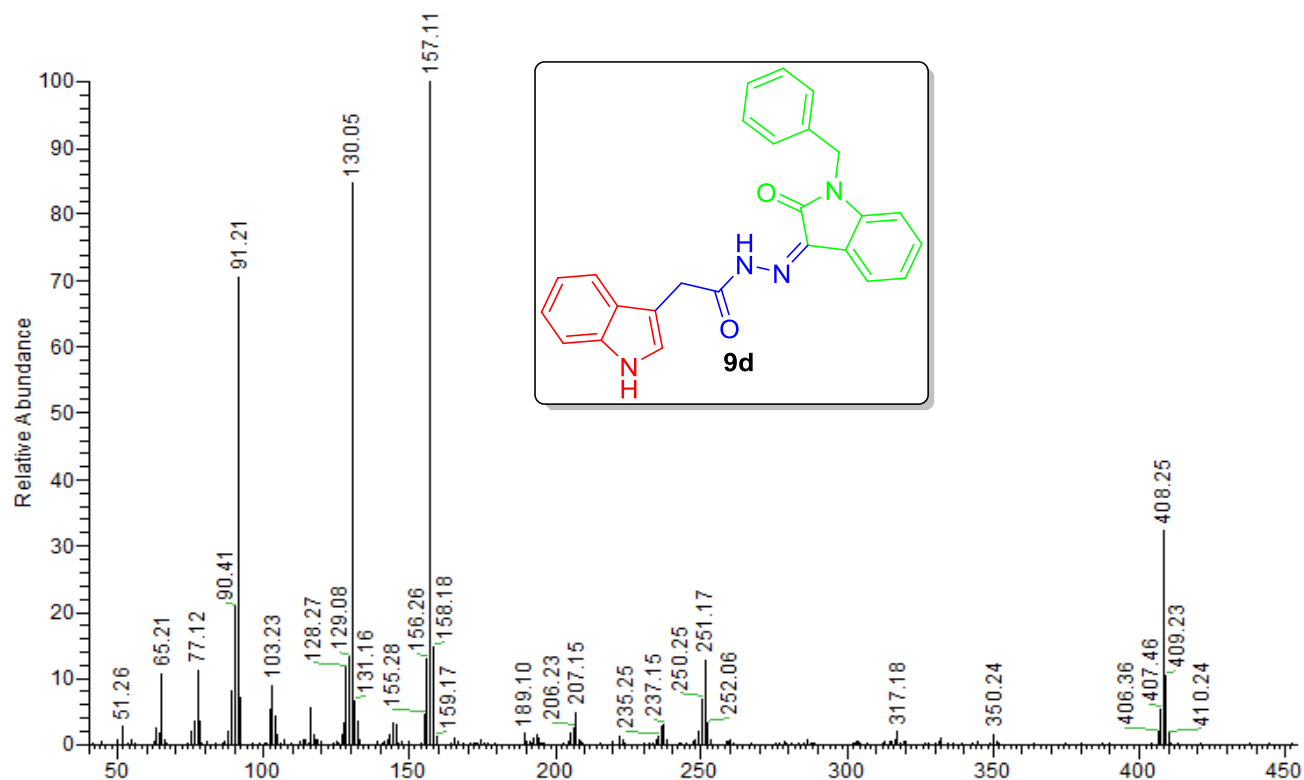

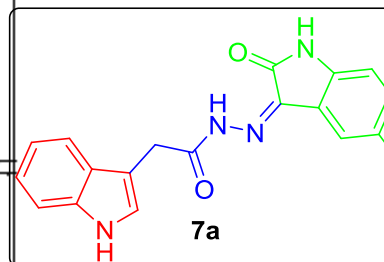

```

Comment      = single pulse
Data Format   = 1D COMPLEX
Dim Size      = 13107
Dim Title     = Proton
Dim Units     = [ppm]
Dimensions    = X
Site          = JNM-ECA500II
Spectrometer  = DELTA2 NMR

```

```
Relaxation_Delay = 5[s]
Recv_Gain        = 40
Temp_Get         = 20.2[°C]
X_90_Width       = 14.5[us]
X_Acq_Time       = 1.4548992[s]
X_Angle          = 45[deg]
X_Atn            = 4.9[dB]
X_Pulse          = 7.25[us]
Irr_Mode         = Off
Tri_Mode         = Off
Dante_Preset     = FALSE
Initial_Wait     = 1[s]
Repetition_Time  = 6.4548992[s]
```

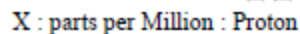

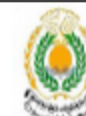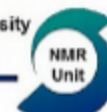

Filename = Dr.Wagdy Mohammed\_3H\_5F\_5F  
 Author = delta  
 Experiment = carbon.jxp  
 Sample\_Id = Dr.Wagdy Mohammed\_3H\_5F\_5F  
 Solvent = DMSO-D6  
 Creation\_Time = 24-SEP-2019 09:16:00  
 Revision\_Time = 24-SEP-2019 12:56:54  
 Current\_Time = 24-SEP-2019 12:57:49

Comment = single pulse decoupled  
 Data\_Format = 1D COMPLEX  
 Dim\_Size = 26214  
 Dim\_Title = Carbon13  
 Dim\_Units = [ppm]  
 Dimensions = X  
 Site = JNM-ECA500II  
 Spectrometer = DELTA2\_NMR

Field\_Strength = 11.7473579[T] (500[MHz])  
 X\_Acq\_Duration = 0.83361792[s]  
 X\_Domain = 13C  
 X\_Freq = 125.76529768[MHz]  
 X\_Offset = 100[ppm]  
 X\_Points = 32768  
 X\_Prescans = 4  
 X\_Resolution = 1.19959034[Hz]  
 X\_Sweep = 39.3081761[kHz]  
 X\_Sweep\_Clipped = 31.44654088[kHz]  
 Irr\_Domain = Proton  
 Irr\_Freq = 500.15991521[MHz]  
 Irr\_Offset = 5.0[ppm]  
 Clipped = FALSE  
 Scans = 3700  
 Total\_Scans = 3700

Relaxation\_Delay = 2[s]  
 Recvr\_Gain = 56  
 Temp\_Get = 20[dc]  
 X\_90\_Width = 52.78[us]  
 X\_Acq\_Time = 0.83361792[s]  
 X\_Angle = 30[deg]  
 X\_Atn = 9.7[dB]  
 X\_Pulse = 17.59333333[us]  
 Irr\_Atn\_Dec = 20.948[dB]  
 Irr\_Atn\_No = 20.948[dB]  
 Irr\_Noise = WALTZ  
 Irr\_Pwidth = 92[us]  
 Decoupling = TRUE  
 Initial\_Wait = 1[s]  
 Noe = TRUE  
 Noe\_Time = 2[s]  
 Repetition\_Time = 2.83361792[s]

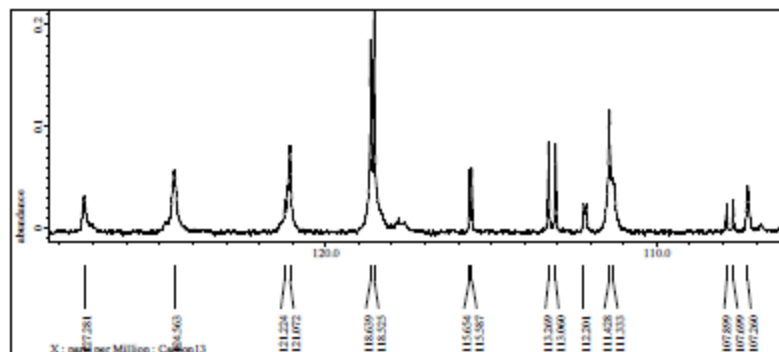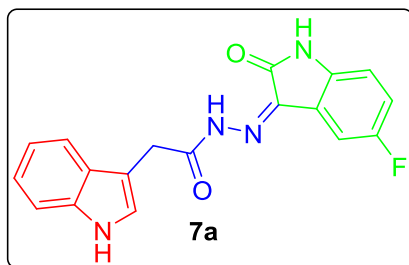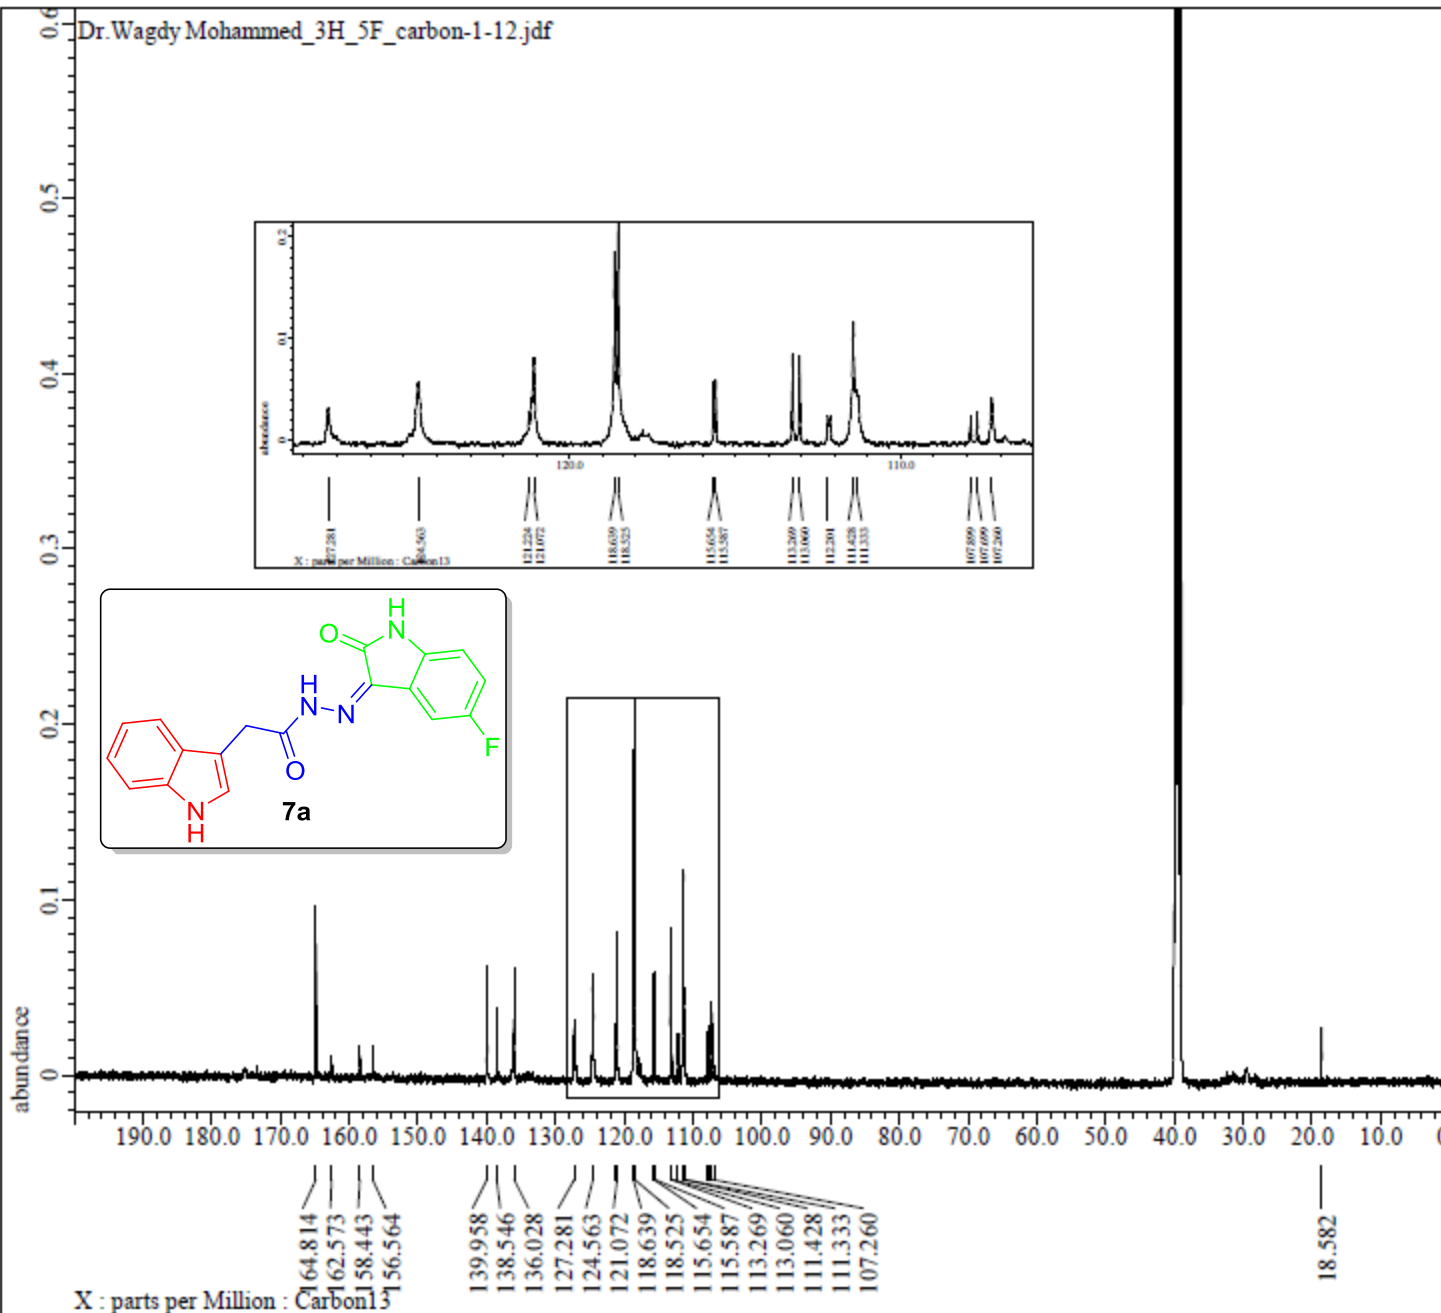



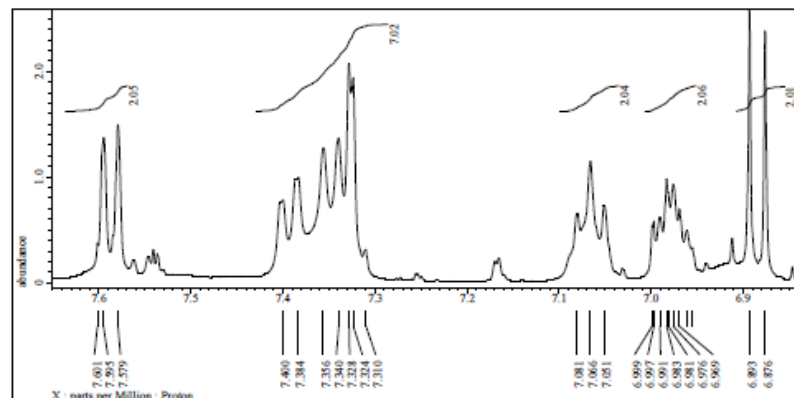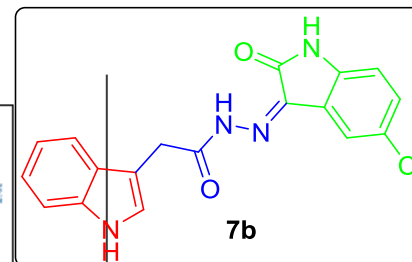

abundance

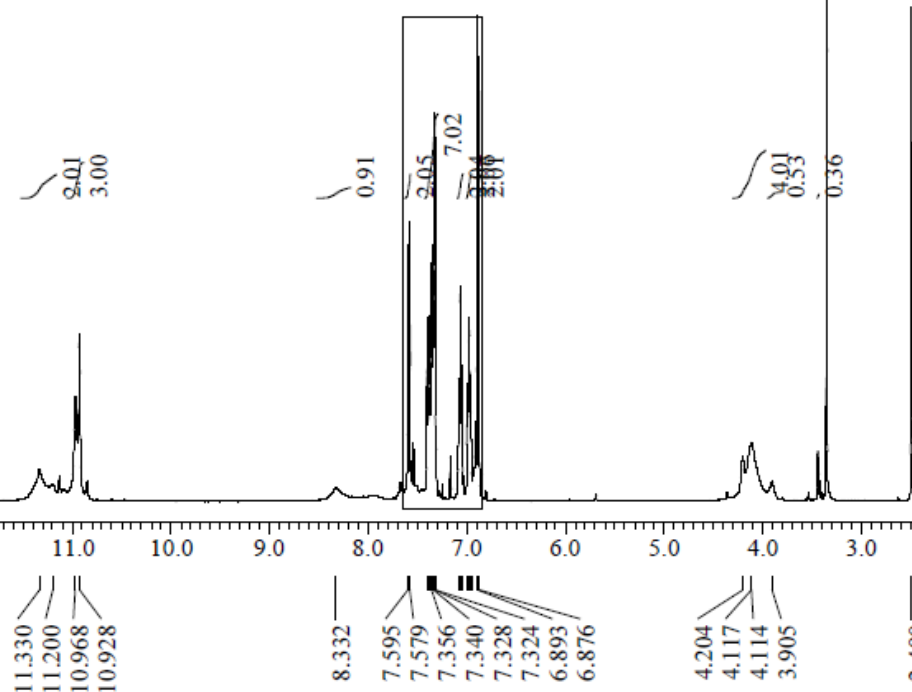

Filename = Dr. Wagdy Mohammed\_3H\_5CL\_proton-1-7.jdf  
 Author = delta  
 Experiment = proton.jpg  
 Sample\_Id = Dr. Wagdy Mohammed\_3H\_5CL\_proton-1-7.jdf  
 Solvent = DMSO-D6  
 Creation\_Time = 23-SEP-2019 10:44:44  
 Revision\_Time = 24-SEP-2019 14:49:32  
 Current\_Time = 24-SEP-2019 14:50:31  
 Comment = single\_pulse  
 Data\_Format = 1D\_COMPLEX  
 Dim\_Size = 26214  
 Dim\_Title = Proton  
 Dim\_Units = [ppm]  
 Dimensions = X  
 Site = JNM-ECA500II  
 Spectrometer = DELTA2\_NMR  
 Field\_Strength = 11.7473579[T] (500[MHz])  
 X\_Acq\_Duration = 1.4548992[s]  
 X\_Domain = 1H  
 X\_Freq = 500.15991521[MHz]  
 X\_Offset = 6[ppm]  
 X\_Points = 16384  
 X\_Prescans = 1  
 X\_Resolution = 0.68733284[Hz]  
 X\_Sweep = 11.26126126[kHz]  
 X\_Sweep\_Clipped = 9.00900901[kHz]  
 Ixr\_Domain = Proton  
 Ixr\_Freq = 500.15991521[MHz]  
 Ixr\_Offset = 5.0[ppm]  
 Tri\_Domain = Proton  
 Tri\_Freq = 500.15991521[MHz]  
 Tri\_Offset = 5.0[ppm]  
 Clipped = FALSE  
 Scans = 40  
 Total\_Scans = 40  
 Relaxation\_Delay = 5[s]  
 Recvr\_Gain = 42  
 Temp\_Get = 20.1[dC]  
 X\_90\_Width = 14.5[us]  
 X\_Acq\_Time = 1.4548992[s]  
 X\_Angle = 45[deg]  
 X\_Atn = 4.9[dB]  
 X\_Pulse = 7.25[us]  
 Ixr\_Mode = Off  
 Tri\_Mode = Off  
 Dante\_Preset = FALSE  
 Initial\_Wait = 1[s]  
 Repetition\_Time = 6.4548992[s]

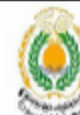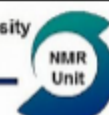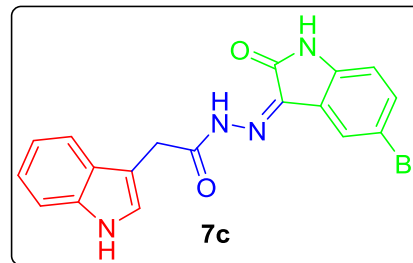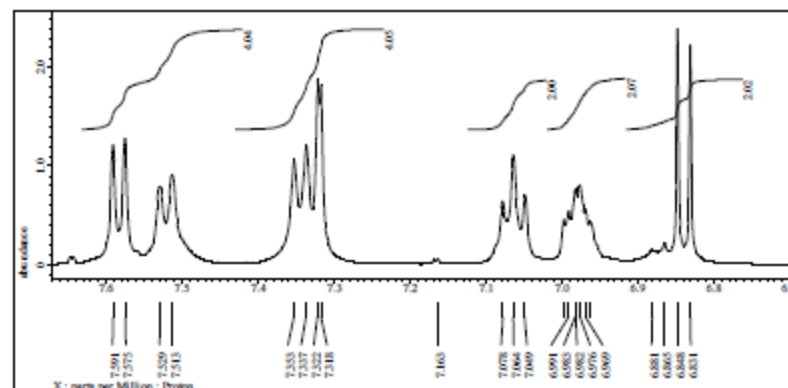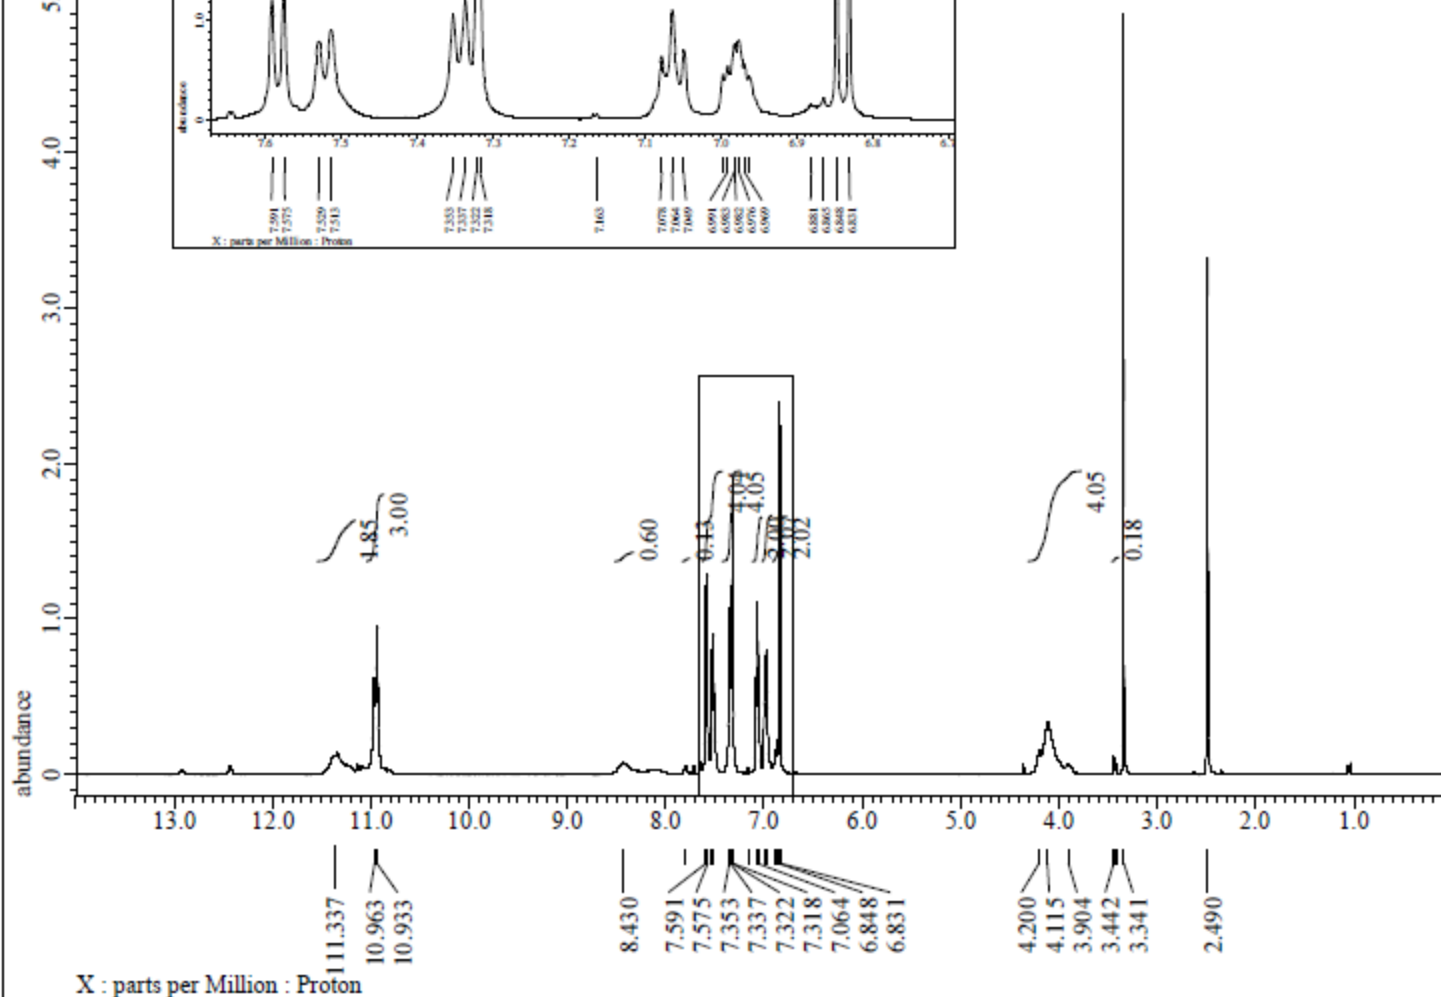

Filename = Dr. Wagdy Mohamd\_3H-5Br\_...  
 Author = delta  
 Experiment = proton.jxp  
 Sample Id = Dr. Wagdy Mohamd\_3H-5Br\_...  
 Solvent = DMSO-d6  
 Creation Time = 17-SEP-2019 15:44:08  
 Revision Time = 17-SEP-2019 15:50:12  
 Current Time = 17-SEP-2019 15:50:40

Comment = single pulse  
 Data Format = 1D COMPLEX  
 Dim Size = 26214  
 Dim Title = Proton  
 Dim Units = [ppm]  
 Dimensions = X  
 Site = JNM-ECA500II  
 Spectrometer = DELTA2\_NMR

Field Strength = 11.7473579[T] (500[MHz])  
 X\_Acq\_Duration = 1.4548992[s]  
 X\_Domain = 1H  
 X\_Freq = 500.15991521[MHz]  
 X\_Offset = 6[ppm]  
 X\_Points = 16384  
 X\_Prescans = 1  
 X\_Resolution = 0.68733284[Hz]  
 X\_Sweep = 11.26126126[kHz]  
 X\_Sweep\_Clipped = 9.00900901[kHz]  
 Irr\_Domain = Proton  
 Irr\_Freq = 500.15991521[MHz]  
 Irr\_Offset = 5.0[ppm]  
 Tri\_Domain = Proton  
 Tri\_Freq = 500.15991521[MHz]  
 Tri\_Offset = 5.0[ppm]  
 Clipped = FALSE  
 Scans = 40  
 Total\_Scans = 40

Relaxation\_Delay = 5[s]  
 Recvr Gain = 46  
 Temp\_Get = 19.9[dC]  
 X\_90\_Width = 14.5[us]  
 X\_Acq\_Time = 1.4548992[s]  
 X\_Angle = 45[deg]  
 X\_Atn = 4.9[dB]  
 X\_Pulse = 7.25[us]  
 Irr\_Mode = Off  
 Tri\_Mode = Off  
 Dante\_Preset = FALSE  
 Initial\_Wait = 1[s]  
 Repetition\_Time = 6.4548992[s]



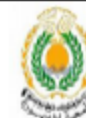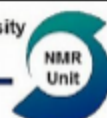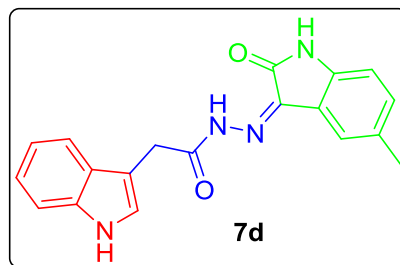

Filename = Dr.Wagdy Mohammed\_3H\_5Me  
 Author = delta  
 Experiment = carbon.jxp  
 Sample\_Id = Dr.Wagdy Mohammed\_3H\_5Me  
 Solvent = DMSO-D6  
 Creation\_Time = 23-SEP-2019 14:56:26  
 Revision\_Time = 24-SEP-2019 13:09:03  
 Current\_Time = 24-SEP-2019 13:09:10

Comment = single pulse decoupled g  
 Data\_Format = 1D COMPLEX  
 Dim\_Size = 26214  
 Dim\_Title = Carbon13  
 Dim\_Units = [ppm]  
 Dimensions = X  
 Site = JNM-ECA500II  
 Spectrometer = DELTA2\_NMR

Field\_Strength = 11.7473579[T] (500[MHz])  
 X\_Acq\_Duration = 0.83361792[s]  
 X\_Domain = 13C  
 X\_Freq = 125.76529768[MHz]  
 X\_Offset = 100[ppm]  
 X\_Points = 32768  
 X\_Prescans = 4  
 X\_Resolution = 1.19959034[Hz]  
 X\_Sweep = 39.3081761[kHz]  
 X\_Sweep\_Clipped = 31.44654088[kHz]  
 Irr\_Domain = Proton  
 Irr\_Freq = 500.15991521[MHz]  
 Irr\_Offset = 5.0[ppm]  
 Clipped = FALSE  
 Scans = 3700  
 Total\_Scans = 3700

Relaxation\_Delay = 2[s]  
 Recvr\_Gain = 58  
 Temp\_Get = 20[dC]  
 X\_90\_Width = 52.78[us]  
 X\_Acq\_Time = 0.83361792[s]  
 X\_Angle = 30[deg]  
 X\_Atn = 9.7[dB]  
 X\_Pulse = 17.59333333[us]  
 Irr\_Atn\_Dec = 20.948[dB]  
 Irr\_Atn\_Noise = 20.948[dB]  
 Irr\_Noise = WALTZ  
 Irr\_Pwidth = 92[us]  
 Decoupling = TRUE  
 Initial\_Wait = 1[s]  
 Noe = TRUE  
 Noe\_Time = 2[s]  
 Repetition\_Time = 2.83361792[s]

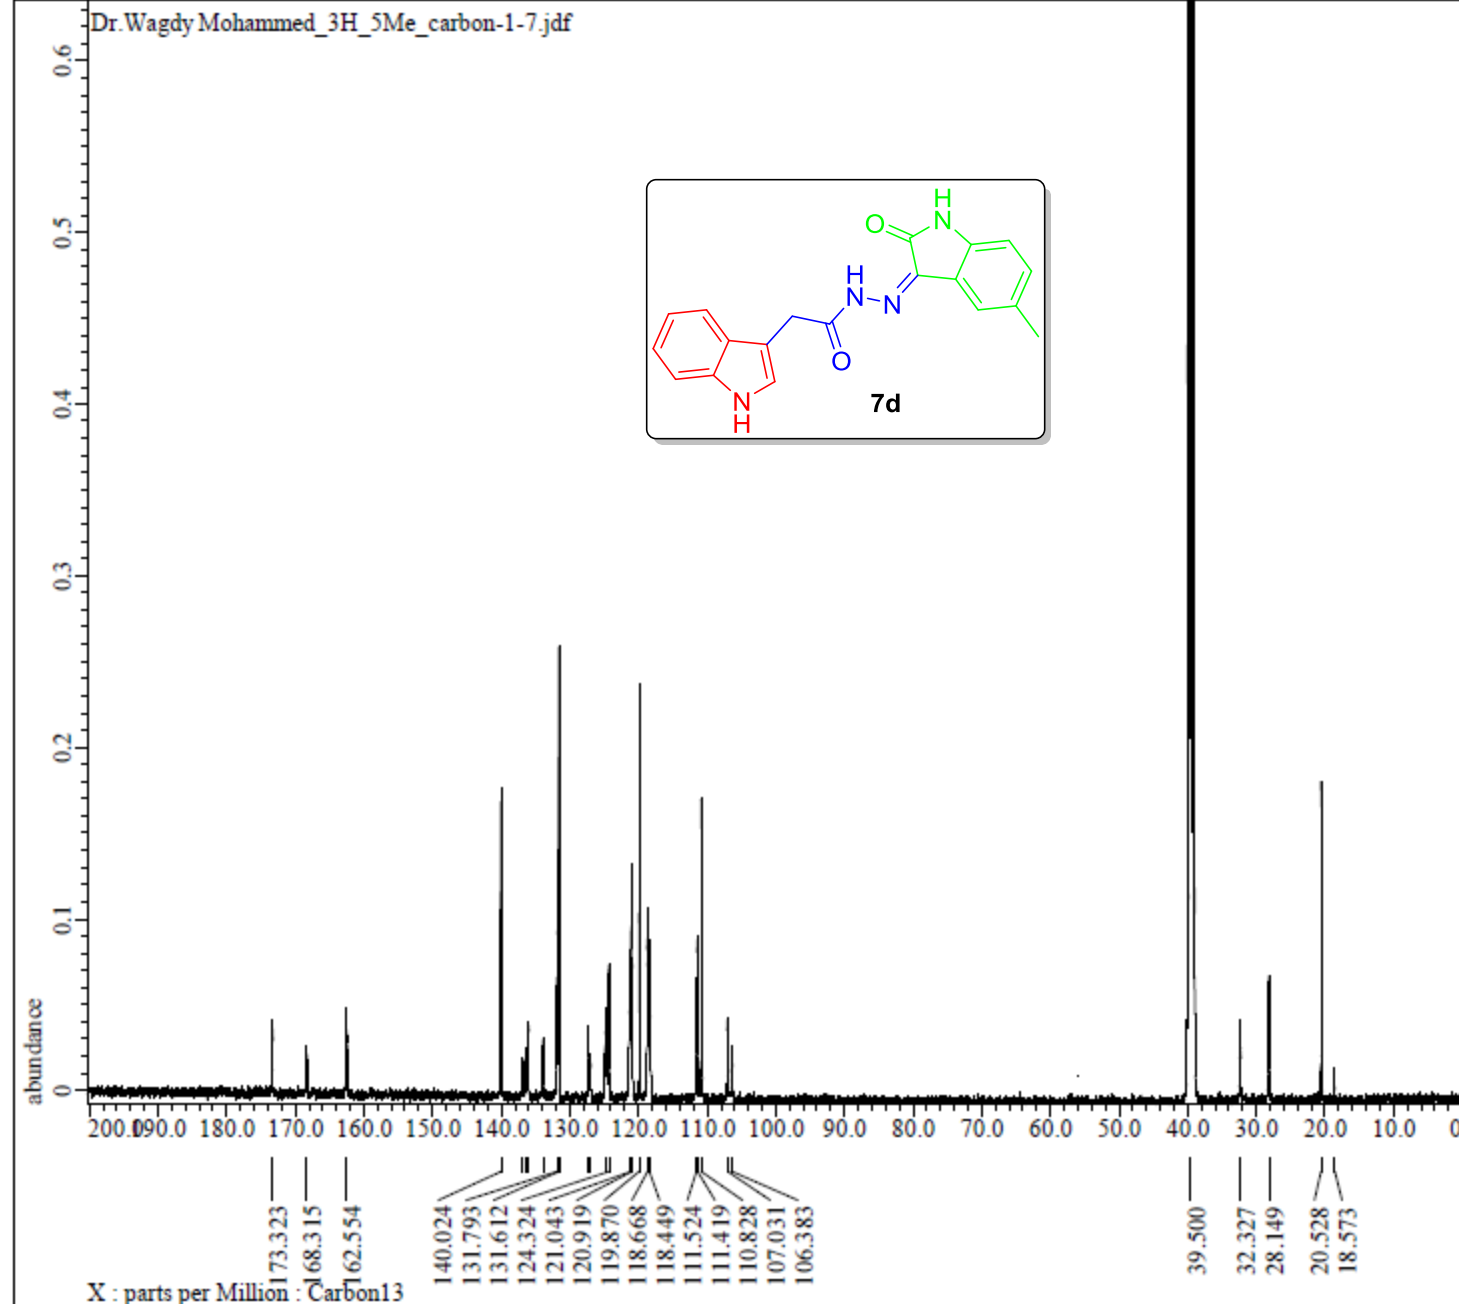

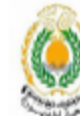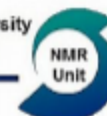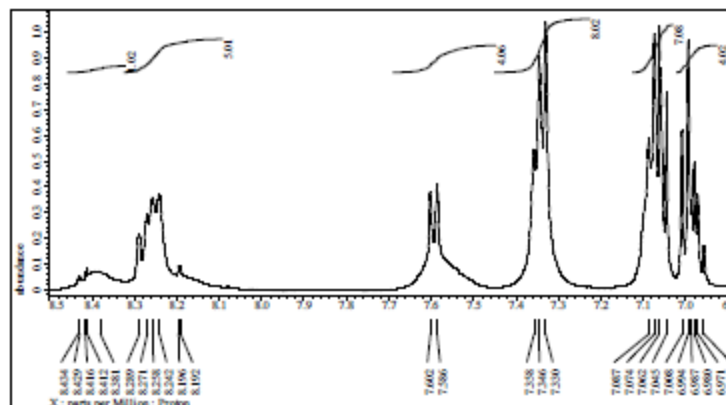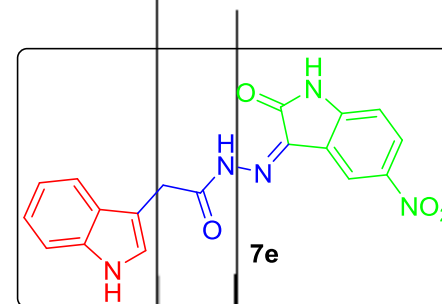

Filename = Dr. Wagdy Mohamd\_3H\_5 N  
 Author = delta  
 Experiment = proton.jxp  
 Sample Id = Dr. Wagdy Mohamd\_3H\_5 N  
 Solvent = DMSO-D6  
 Creation Time = 26-SEP-2019 14:55:25  
 Revision Time = 26-SEP-2019 14:43:57  
 Current Time = 26-SEP-2019 14:44:23

Comment = single pulse  
 Data Format = 1D COMPLEX  
 Dim Size = 26214  
 Dim Title = Proton  
 Dim Units = [ppm]  
 Dimensions = X  
 Site = JNM-ECA500II  
 Spectrometer = DELTA2 NMR

Field Strength = 11.7473579 [T] (500 [MHz])  
 X\_Acq\_Duration = 1.4548992 [s]  
 X\_Domain = 1H  
 X\_Freq = 500.15991521 [MHz]  
 X\_Offset = 6 [ppm]  
 X\_Points = 16384  
 X\_Prescans = 1  
 X\_Resolution = 0.68733284 [Hz]  
 X\_Sweep = 11.26126126 [kHz]  
 X\_Sweep\_Clippped = 9.00900901 [kHz]  
 Irr\_Domain = Proton  
 Irr\_Freq = 500.15991521 [MHz]  
 Irr\_Offset = 5.0 [ppm]  
 Tri\_Domain = Proton  
 Tri\_Freq = 500.15991521 [MHz]  
 Tri\_Offset = 5.0 [ppm]  
 Clipped = FALSE  
 Scans = 40  
 Total\_Scans = 40

Relaxation\_Delay = 5 [s]  
 Recvr\_Gain = 42  
 Temp\_Get = 20.8 [dC]  
 X\_90\_Width = 14.5 [us]  
 X\_Acq\_Time = 1.4548992 [s]  
 X\_Angle = 45 [deg]  
 X\_Atn = 4.9 [dB]  
 X\_Pulse = 7.25 [us]  
 Irr\_Mode = Off  
 Tri\_Mode = Off  
 Dante\_Preset = FALSE  
 Initial\_Wait = 1 [s]  
 Repetition\_Time = 6.4548992 [s]

abundance

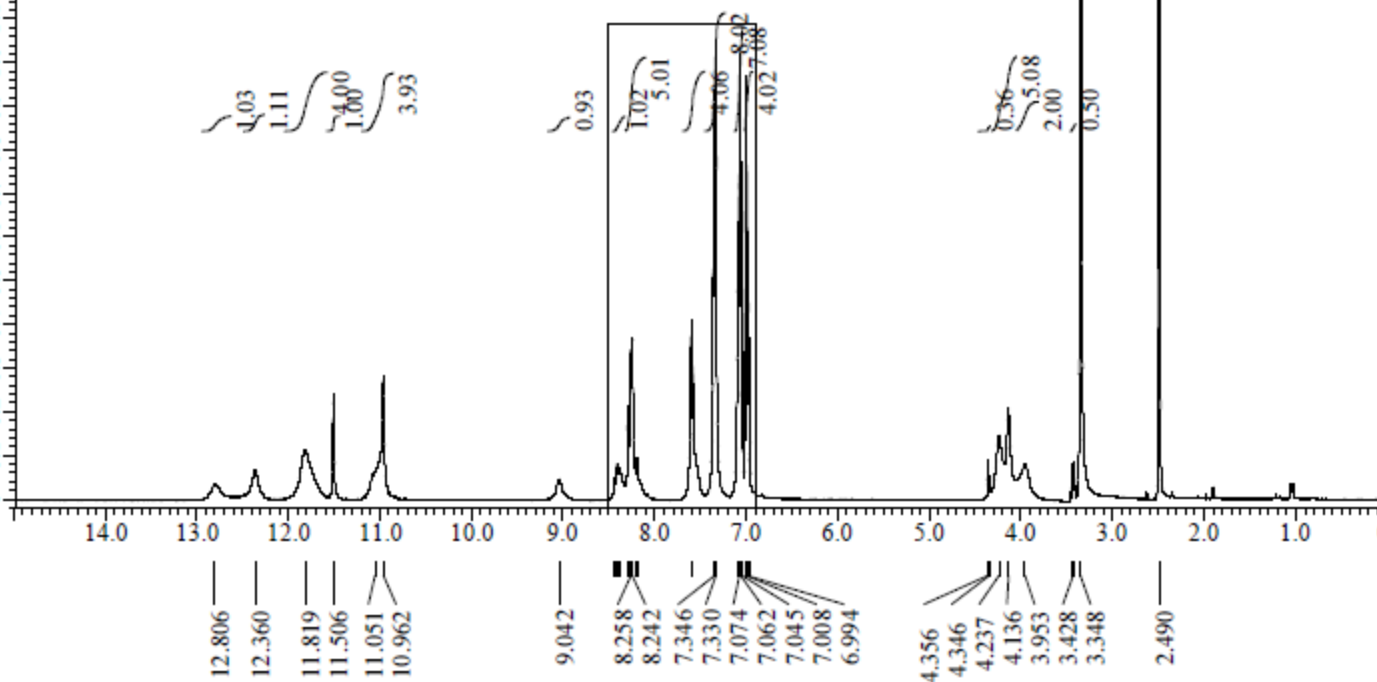

X : parts per Million : Proton

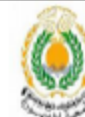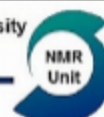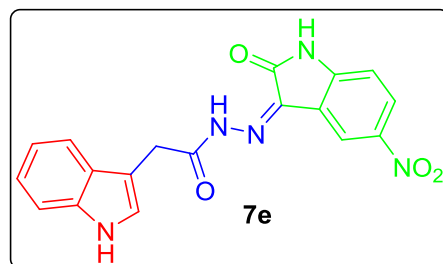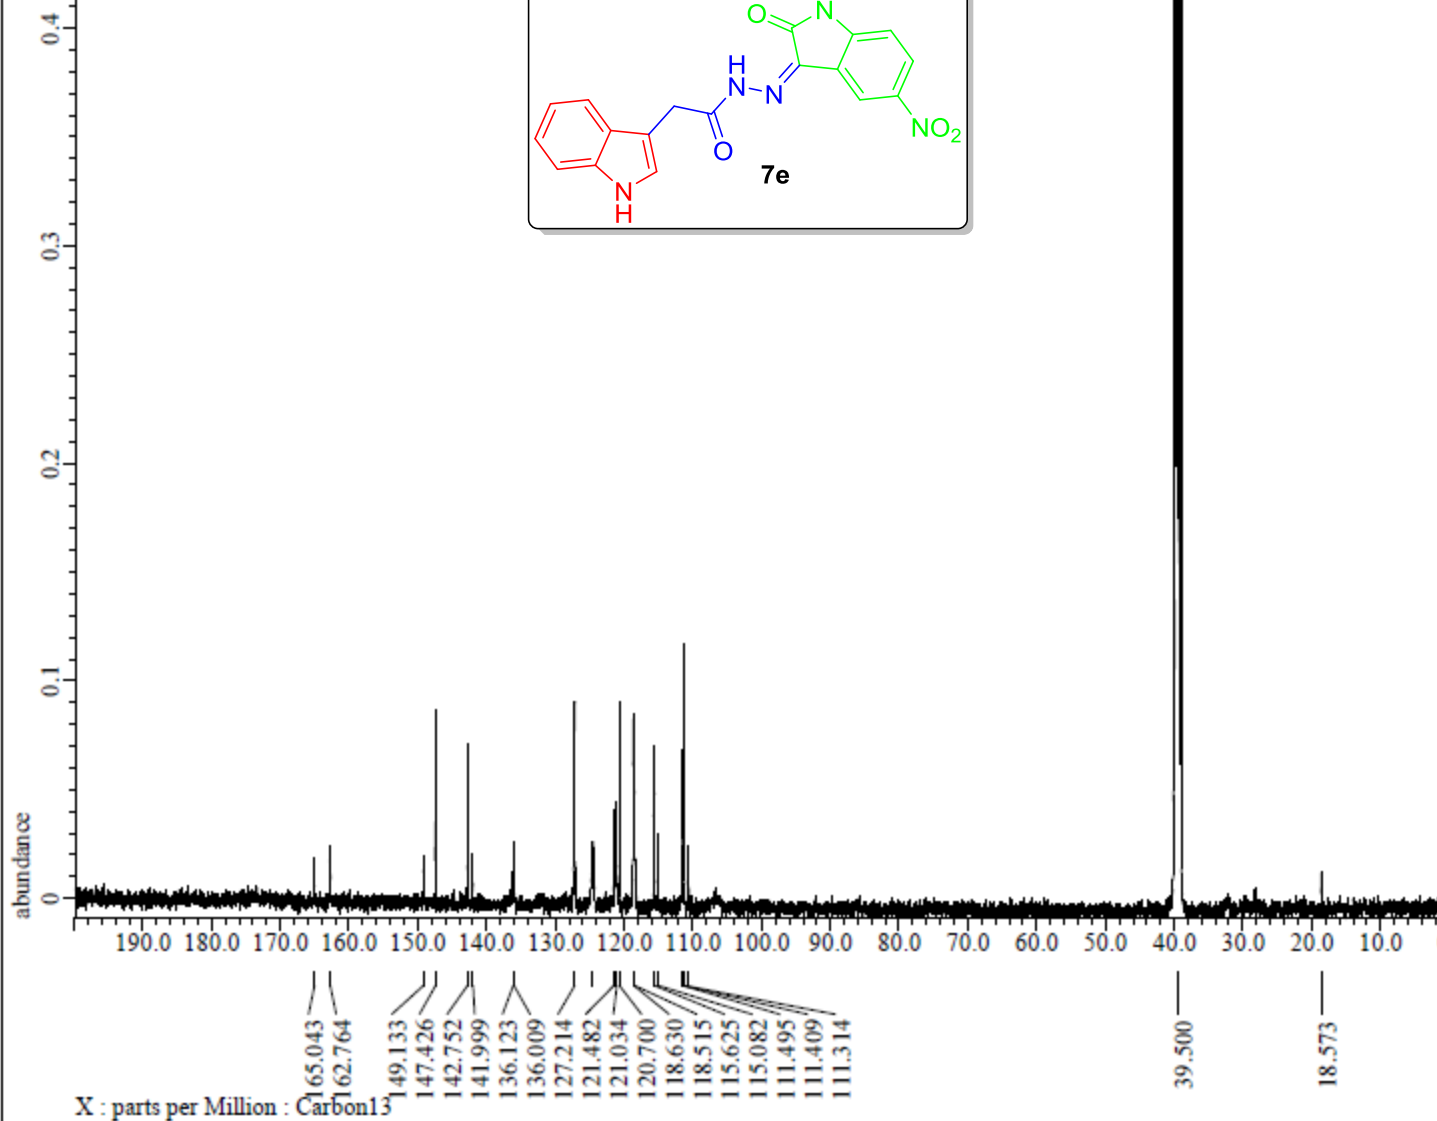

Filename = Dr. Wagdy Mohamd\_3H\_5 N  
 Author = delta  
 Experiment = carbon.jxp  
 Sample Id = Dr. Wagdy Mohamd\_3H\_5 N  
 Solvent = DMSO-D6  
 Creation Time = 26-SEP-2019 15:01:52  
 Revision Time = 26-SEP-2019 16:03:23  
 Current Time = 26-SEP-2019 16:04:17  
 Comment = single pulse decoupled  
 Data Format = 1D COMPLEX  
 Dim Size = 26214  
 Dim Title = Carbon13  
 Dim Units = [ppm]  
 Dimensions = X  
 Site = JNM-ECA500II  
 Spectrometer = DELTA2\_NMR  
 Field Strength = 11.7473579[T] (500[MHz])  
 X\_Acq\_Duration = 0.83361792[s]  
 X\_Domain = 13C  
 X\_Freq = 125.76529768[MHz]  
 X\_Offset = 100[ppm]  
 X\_Points = 32768  
 X\_Prescans = 4  
 X\_Resolution = 1.19959034[Hz]  
 X\_Sweep = 39.3081761[kHz]  
 X\_Sweep\_Clipped = 31.44654088[kHz]  
 Irr\_Domain = Proton  
 Irr\_Freq = 500.15991521[MHz]  
 Irr\_Offset = 5.0[ppm]  
 Clipped = FALSE  
 Scans = 2105  
 Total\_Scans = 2105  
 Relaxation\_Delay = 2[s]  
 Recvr\_Gain = 58  
 Temp\_Get = 20.5[dC]  
 X\_90\_Width = 52.78[us]  
 X\_Acq\_Time = 0.83361792[s]  
 X\_Angle = 30[deg]  
 X\_Atn = 9.7[dB]  
 X\_Pulse = 17.59333333[us]  
 Irr\_Atn\_Dec = 20.948[dB]  
 Irr\_Atn\_No2 = 20.948[dB]  
 Irr\_Noise = WALTZ  
 Irr\_Pwidth = 92[us]  
 Decoupling = TRUE  
 Initial\_Wait = 1[s]  
 Noe = TRUE  
 Noe Time = 2[s]  
 Repetition Time = 2.83361792[s]



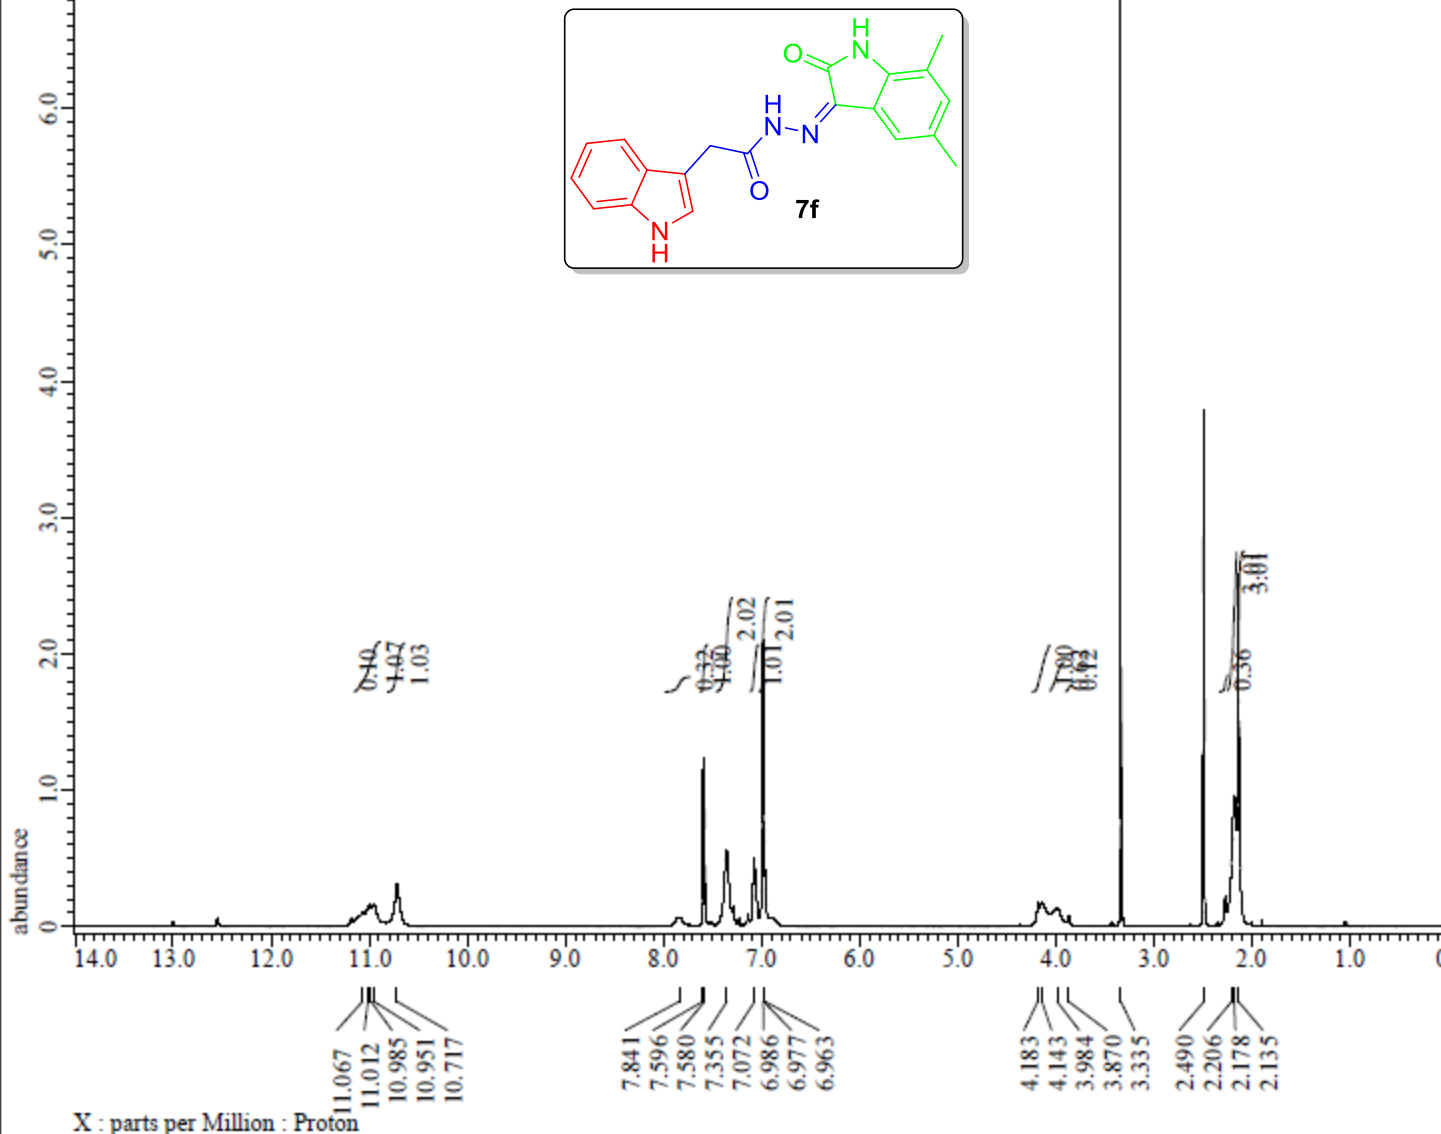

```

Filename           = Dr. Wagdy Mohamd_3H-5,7
Author             = delta
Experiment          = proton.jxp
Sample_Id          = Dr. Wagdy Mohamd_3H-5,7
Solvent            = DMSO-D6
Creation_Time      = 17-SEP-2019 15:06:47
Revision_Time      = 17-SEP-2019 15:07:51
Current_Time       = 17-SEP-2019 15:07:58

Comment            = single_pulse
Data_Format        = 1D COMPLEX
Dim_Size           = 26214
Dim_Title          = Proton
Dim_Units          = [ppm]
Dimensions         = X
Site               = JNM-ECA500II
Spectrometer       = DELTA2_NMR

Field_Strength     = 11.7473579[T] (500[MHz])
X_Acq_Duration     = 1.4548992[s]
X_Domain           = 1H
X_Freq             = 500.15991521[MHz]
X_Offset           = 6[ppm]
X_Points           = 16384
X_Prescans         = 1
X_Resolution       = 0.68733284[Hz]
X_Sweep            = 11.26126126[kHz]
X_Sweep_Clippped  = 9.00900901[kHz]
Irr_Domain         = Proton
Irr_Freq           = 500.15991521[MHz]
Irr_Offset         = 5.0[ppm]
Tri_Domain         = Proton
Tri_Freq           = 500.15991521[MHz]
Tri_Offset         = 5.0[ppm]
Clipped            = FALSE
Scans              = 40
Total_Scans       = 40

Relaxation_Delay   = 5[s]
Recvr_Gain         = 46
Temp_Get           = 19.9[dc]
X_90_Width         = 14.5[us]
X_Acq_Time         = 1.4548992[s]
X_Angle            = 45[deg]
X_Atn              = 4.9[dB]
X_Pulse            = 7.25[us]
Irr_Mode           = Off
Tri_Mode           = Off
Dante_Preset       = FALSE
Initial_Wait       = 1[s]
Repetition_Time    = 6.4548992[s]

```

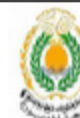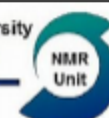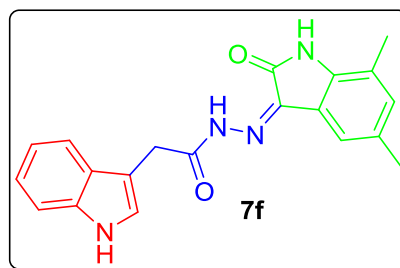

Filename = Dr.Wagdy Mohammed\_3H\_5,7\_carbon-1-7.jdf  
 Author = delta  
 Experiment = carbon.jxp  
 Sample\_Id = Dr.Wagdy Mohammed\_3H\_5,7\_carbon-1-7.jdf  
 Solvent = DMSO-D6  
 Creation\_Time = 24-SEP-2019 13:28:13  
 Revision\_Time = 24-SEP-2019 15:44:03  
 Current\_Time = 24-SEP-2019 15:44:11

Comment = single pulse decoupled  
 Data\_Format = 1D COMPLEX  
 Dim\_Size = 26214  
 Dim\_Title = Carbon13  
 Dim\_Units = [ppm]  
 Dimensions = X  
 Site = JNM-ECA500II  
 Spectrometer = DELTA2 NMR

Field\_Strength = 11.7473579[T] (500[MHz])  
 X\_Acq\_Duration = 0.83361792[s]  
 X\_Domain = 13C  
 X\_Freq = 125.76529768[MHz]  
 X\_Offset = 100[ppm]  
 X\_Points = 32768  
 X\_Prescans = 4  
 X\_Resolution = 1.19959034[Hz]  
 X\_Sweep = 39.3081761[kHz]  
 X\_Sweep\_Clipped = 31.44654088[kHz]  
 Irr\_Domain = Proton  
 Irr\_Freq = 500.15991521[MHz]  
 Irr\_Offset = 5.0[ppm]  
 Clipped = FALSE  
 Scans = 3300  
 Total\_Scans = 3300

Relaxation\_Delay = 2[s]  
 Recvr\_Gain = 58  
 Temp\_Get = 19.8[dC]  
 X\_90\_Width = 52.78[us]  
 X\_Acq\_Time = 0.83361792[s]  
 X\_Angle = 30[deg]  
 X\_Atn = 9.7[dB]  
 X\_Pulse = 17.59333333[us]  
 Irr\_Atn\_Dec = 20.948[dB]  
 Irr\_Atn\_Noe = 20.948[dB]  
 Irr\_Noise = WALTZ  
 Irr\_Pwidth = 92[us]  
 Decoupling = TRUE  
 Initial\_Wait = 1[s]  
 Noe = TRUE  
 Noe\_Time = 2[s]  
 Repetition\_Time = 2.83361792[s]

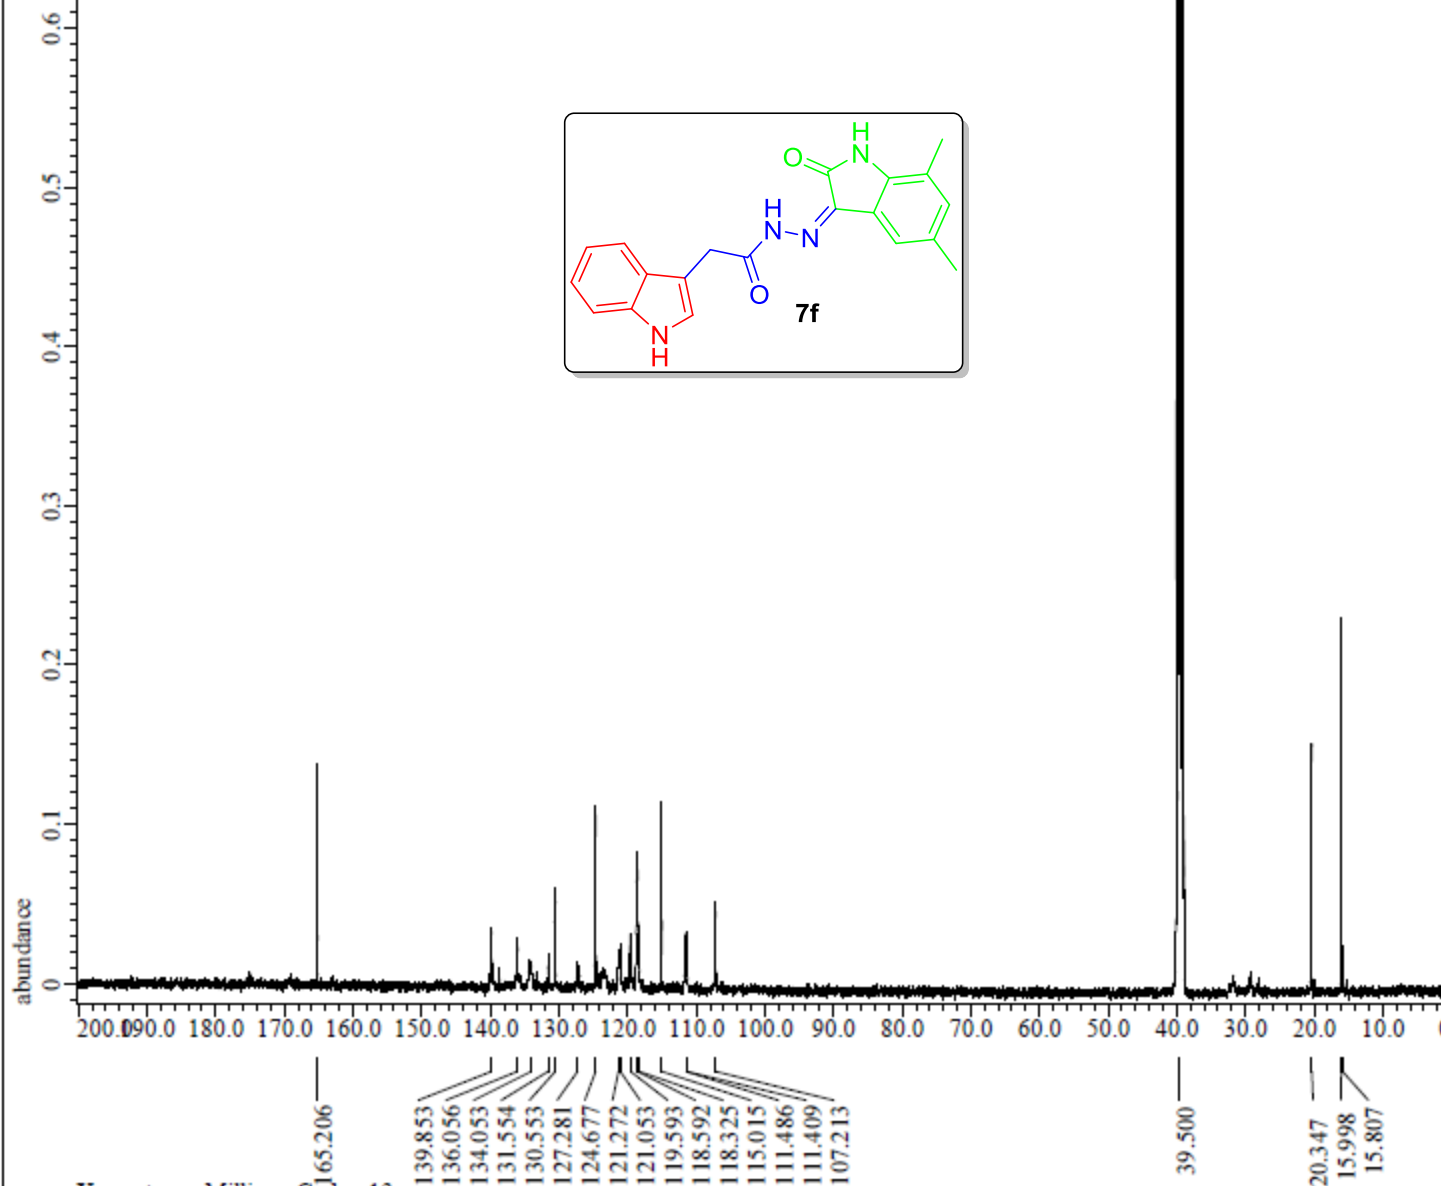



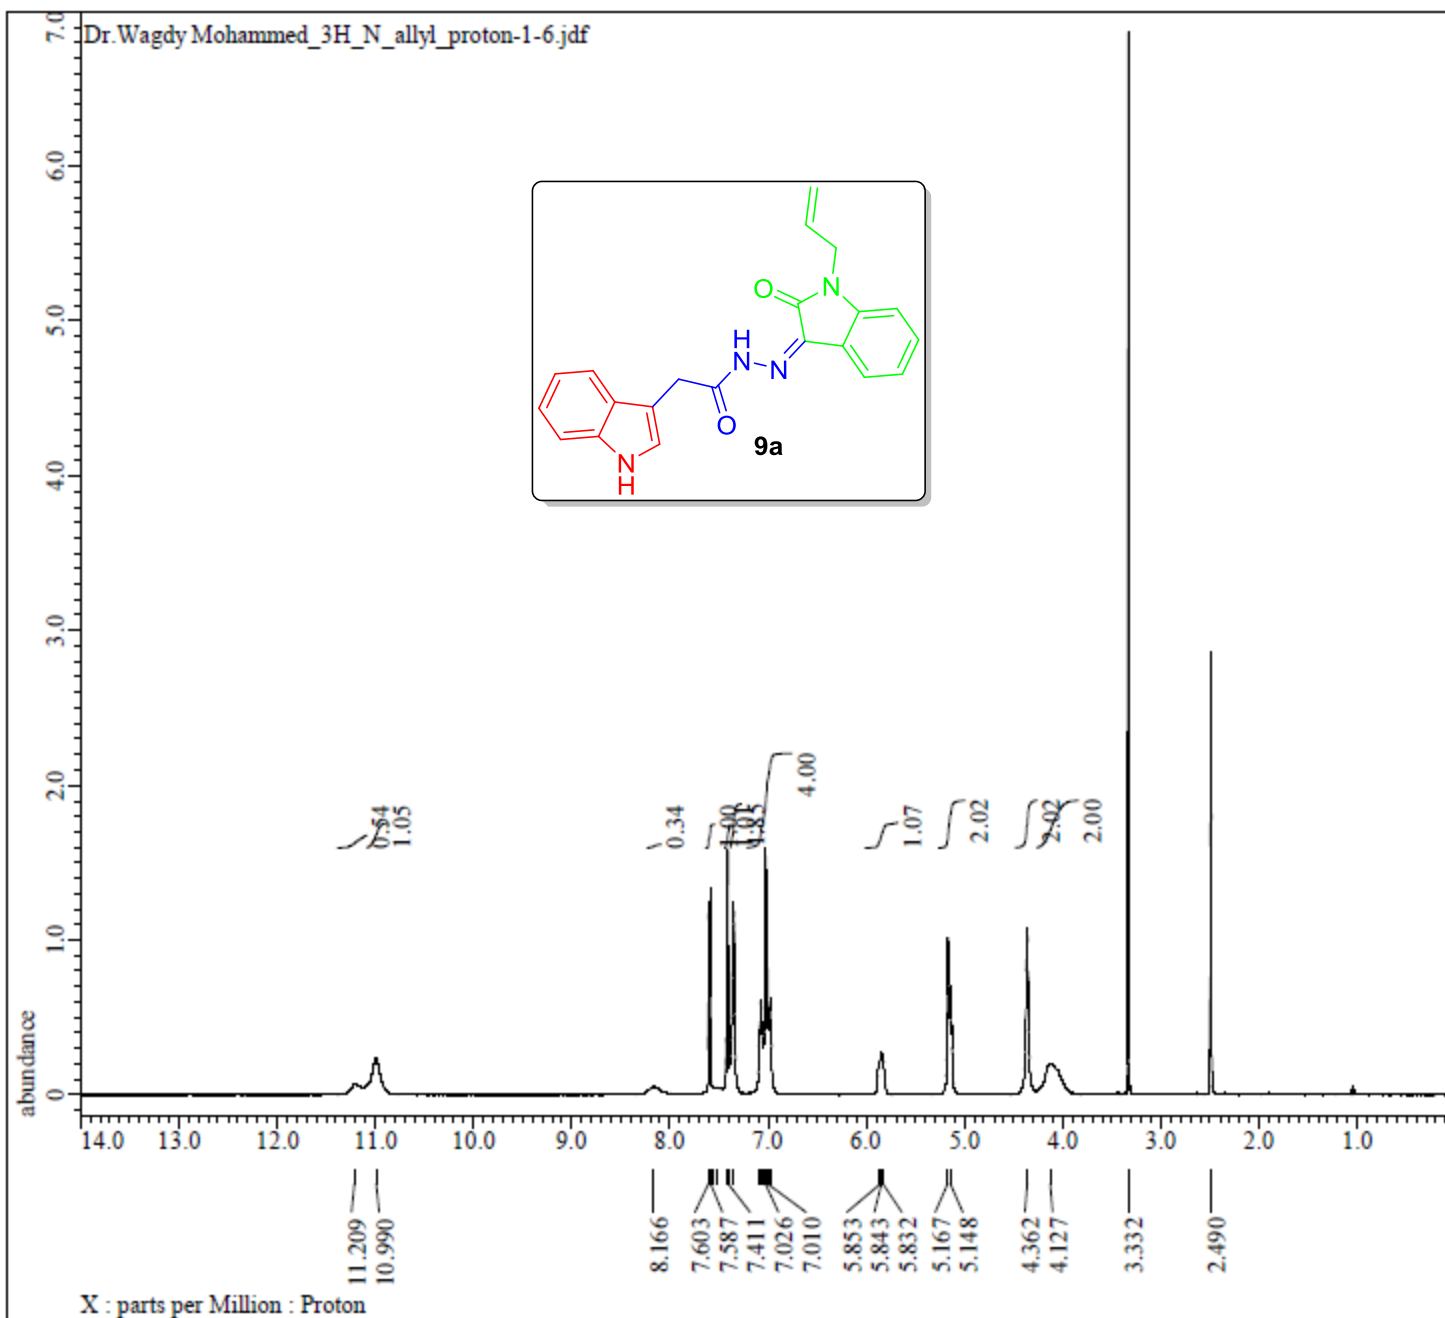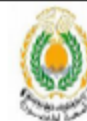

Mansoura University

JEOL

ECA- 500 II

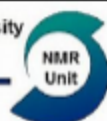

Filename = Dr.Wagdy Mohammed\_3H\_N\_  
 Author = delta  
 Experiment = proton.jxp  
 Sample Id = Dr.Wagdy Mohammed\_3H\_N\_  
 Solvent = DMSO-D6  
 Creation Time = 23-SEP-2019 11:39:35  
 Revision Time = 26-SEP-2019 12:56:00  
 Current Time = 26-SEP-2019 12:56:28

Comment = single\_pulse  
 Data Format = 1D COMPLEX  
 Dim Size = 13107  
 Dim Title = Proton  
 Dim Units = [ppm]  
 Dimensions = X  
 Site = JNM-ECA500II  
 Spectrometer = DELTA2\_MMR

Field Strength = 11.7473579[T] (500[MHz])  
 X\_Acq\_Duration = 1.4548992[s]  
 X\_Domain = 1H  
 X\_Freq = 500.15991521[MHz]  
 X\_Offset = 6[ppm]  
 X\_Points = 16384  
 X\_Prescans = 1  
 X\_Resolution = 0.68733284[Hz]  
 X\_Sweep = 11.26126126[kHz]  
 X\_Sweep\_Clipped = 9.00900901[kHz]  
 Irr\_Domain = Proton  
 Irr\_Freq = 500.15991521[MHz]  
 Irr\_Offset = 5.0[ppm]  
 Tri\_Domain = Proton  
 Tri\_Freq = 500.15991521[MHz]  
 Tri\_Offset = 5.0[ppm]  
 Clipped = FALSE  
 Scans = 40  
 Total\_Scans = 40

Relaxation\_Delay = 5[s]  
 Recvr\_Gain = 44  
 Temp\_Get = 21.1[dC]  
 X\_90\_Width = 14.5[us]  
 X\_Acq\_Time = 1.4548992[s]  
 X\_Angle = 45[deg]  
 X\_Atn = 4.9[dB]  
 X\_Pulse = 7.25[us]  
 Irr\_Mode = Off  
 Tri\_Mode = Off  
 Dante\_Presat = FALSE  
 Initial\_Wait = 1[s]  
 Repetition\_Time = 6.4548992[s]

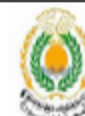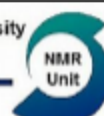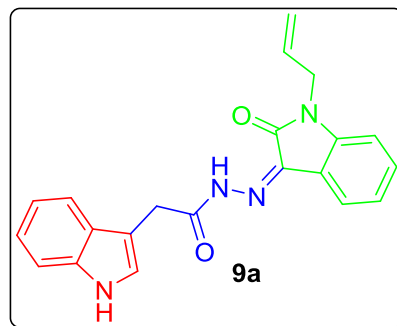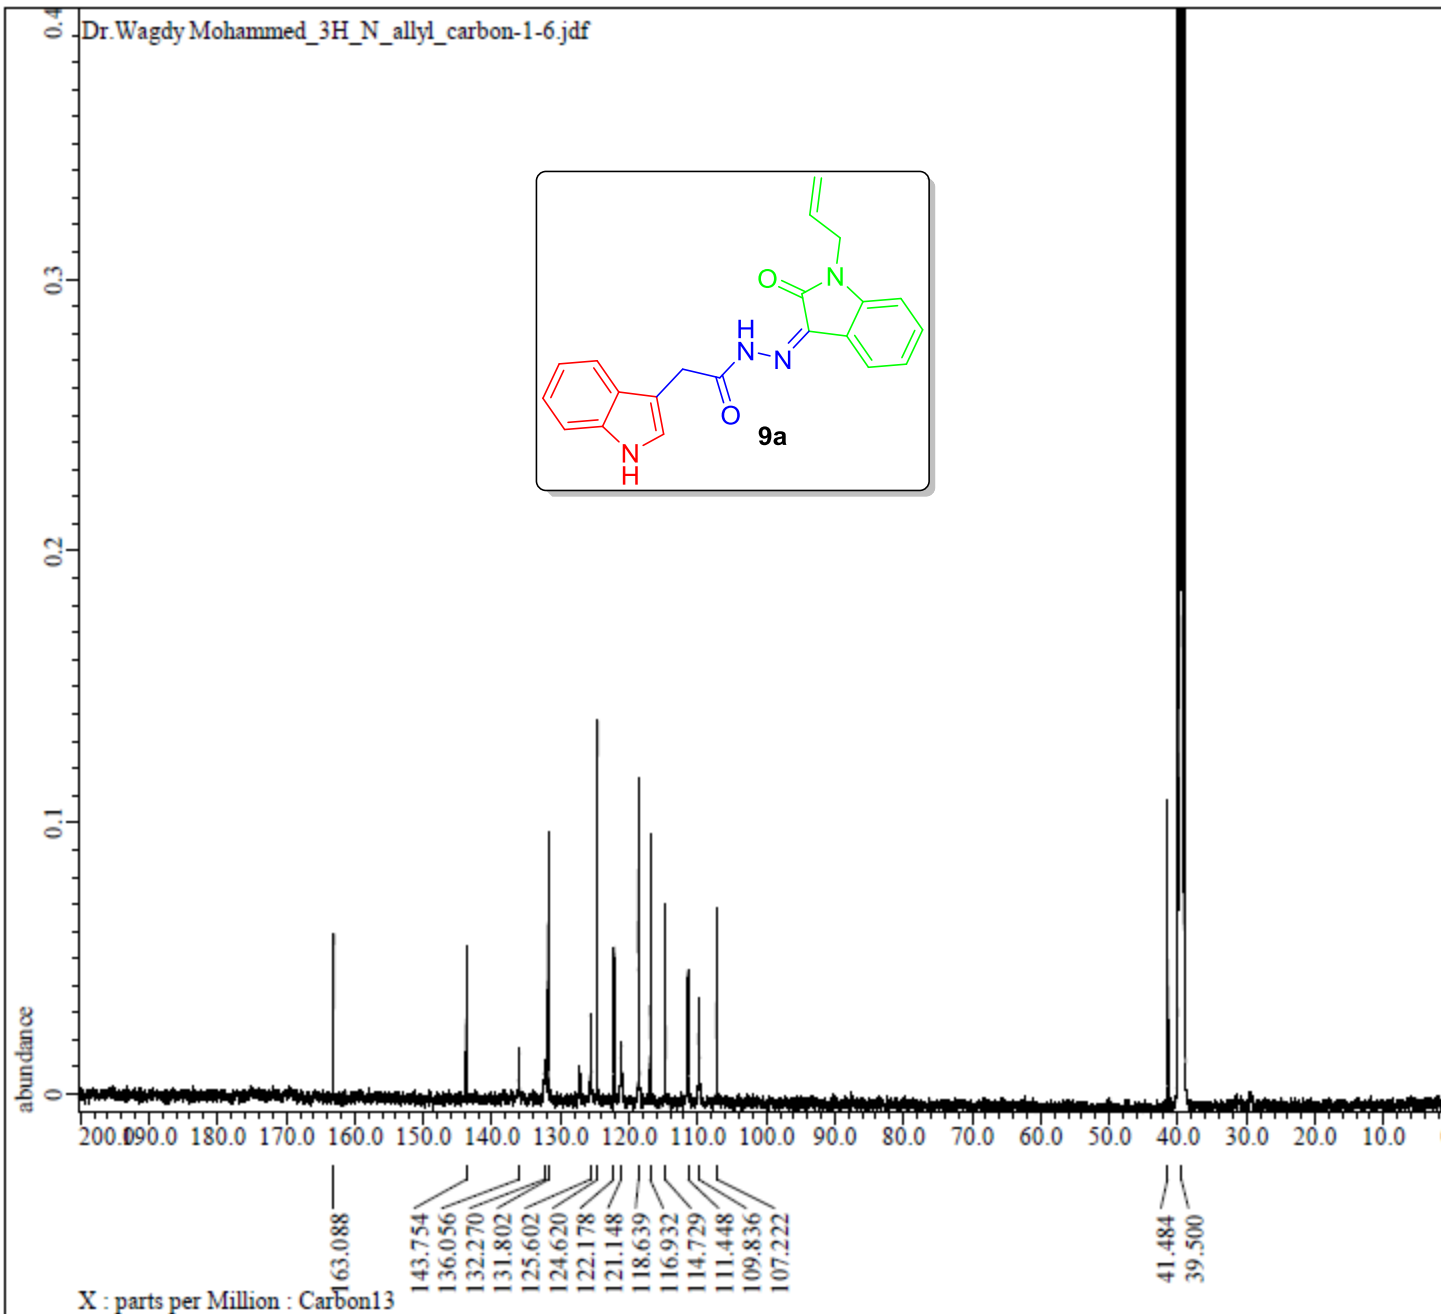

Filename = Dr.Wagdy Mohammed\_3H\_N\_...  
 Author = delta  
 Experiment = carbon.jxp  
 Sample\_Id = Dr.Wagdy Mohammed\_3H\_N\_...  
 Solvent = DMSO-D6  
 Creation\_Time = 24-SEP-2019 00:07:16  
 Revision\_Time = 24-SEP-2019 12:47:45  
 Current\_Time = 24-SEP-2019 12:48:40  
 Comment = single pulse decoupled  
 Data\_Format = 1D COMPLEX  
 Dim\_Size = 26214  
 Dim\_Title = Carbon13  
 Dim\_Units = [ppm]  
 Dimensions = X  
 Site = JNM-ECA500II  
 Spectrometer = DELTA2\_NMR  
 Field\_Strength = 11.7473579 [T] (500[MHz])  
 X\_Acq\_Duration = 0.83361792 [s]  
 X\_Domain = 13C  
 X\_Freq = 125.76529768 [MHz]  
 X\_Offset = 100 [ppm]  
 X\_Points = 32768  
 X\_Prescans = 4  
 X\_Resolution = 1.19959034 [Hz]  
 X\_Sweep = 39.3081761 [kHz]  
 X\_Sweep\_Clipped = 31.44654088 [kHz]  
 Irr\_Domain = Proton  
 Irr\_Freq = 500.15991521 [MHz]  
 Irr\_Offset = 5.0 [ppm]  
 Clipped = FALSE  
 Scans = 3700  
 Total\_Scans = 3700  
 Relaxation\_Delay = 2 [s]  
 Recvr\_Gain = 56  
 Temp\_Get = 18.6 [dC]  
 X\_90\_Width = 52.78 [us]  
 X\_Acq\_Time = 0.83361792 [s]  
 X\_Angle = 30 [deg]  
 X\_Atn = 9.7 [dB]  
 X\_Pulse = 17.59333333 [us]  
 Irr\_Atn\_Dec = 20.948 [dB]  
 Irr\_Atn\_Hoe = 20.948 [dB]  
 Irr\_Noise = WALTZ  
 Irr\_Pwidth = 92 [us]  
 Decoupling = TRUE  
 Initial\_Wait = 1 [s]  
 Noe = TRUE  
 Noe\_Time = 2 [s]  
 Repetition\_Time = 2.83361792 [s]

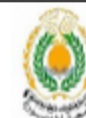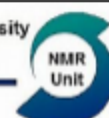

Filename = Dr.Wagdy Mohammed\_3H\_iso  
 Author = delta  
 Experiment = proton.jxp  
 Sample\_Id = Dr.Wagdy Mohammed\_3H\_iso  
 Solvent = DMSO-D6  
 Creation\_Time = 23-SEP-2019 13:21:15  
 Revision\_Time = 24-SEP-2019 15:51:53  
 Current\_Time = 24-SEP-2019 15:52:30

Comment = single\_pulse  
 Data\_Format = 1D\_COMPLEX  
 Dim\_Size = 13107  
 Dim\_Title = Proton  
 Dim\_Units = [ppm]  
 Dimensions = X  
 Site = JNM-ECA500II  
 Spectrometer = DELTA2\_NMR

Field\_Strength = 11.7473579[T] (500[MHz])  
 X\_Acq\_Duration = 1.4548992[s]  
 X\_Domain = 1H  
 X\_Freq = 500.15991521[MHz]  
 X\_Offset = 6[ppm]  
 X\_Points = 16384  
 X\_Prescans = 1  
 X\_Resolution = 0.68733284[Hz]  
 X\_Sweep = 11.26126126[kHz]  
 X\_Sweep\_Clipped = 9.00900901[kHz]  
 Irr\_Domain = Proton  
 Irr\_Freq = 500.15991521[MHz]  
 Irr\_Offset = 5.0[ppm]  
 Tri\_Domain = Proton  
 Tri\_Freq = 500.15991521[MHz]  
 Tri\_Offset = 5.0[ppm]  
 Clipped = FALSE  
 Scans = 40  
 Total\_Scans = 40

Relaxation\_Delay = 5[s]  
 Recvr\_Gain = 42  
 Temp\_Get = 20.3[deg]  
 X\_90\_Width = 14.5[us]  
 X\_Acq\_Time = 1.4548992[s]  
 X\_Angle = 45[deg]  
 X\_Atn = 4.9[dB]  
 X\_Pulse = 7.25[us]  
 Irr\_Mode = Off  
 Tri\_Mode = Off  
 Dante\_Presat = FALSE  
 Initial\_Wait = 1[s]  
 Repetition\_Time = 6.4548992[s]

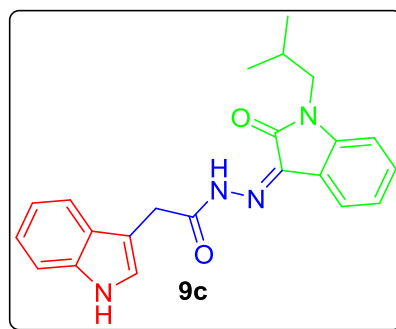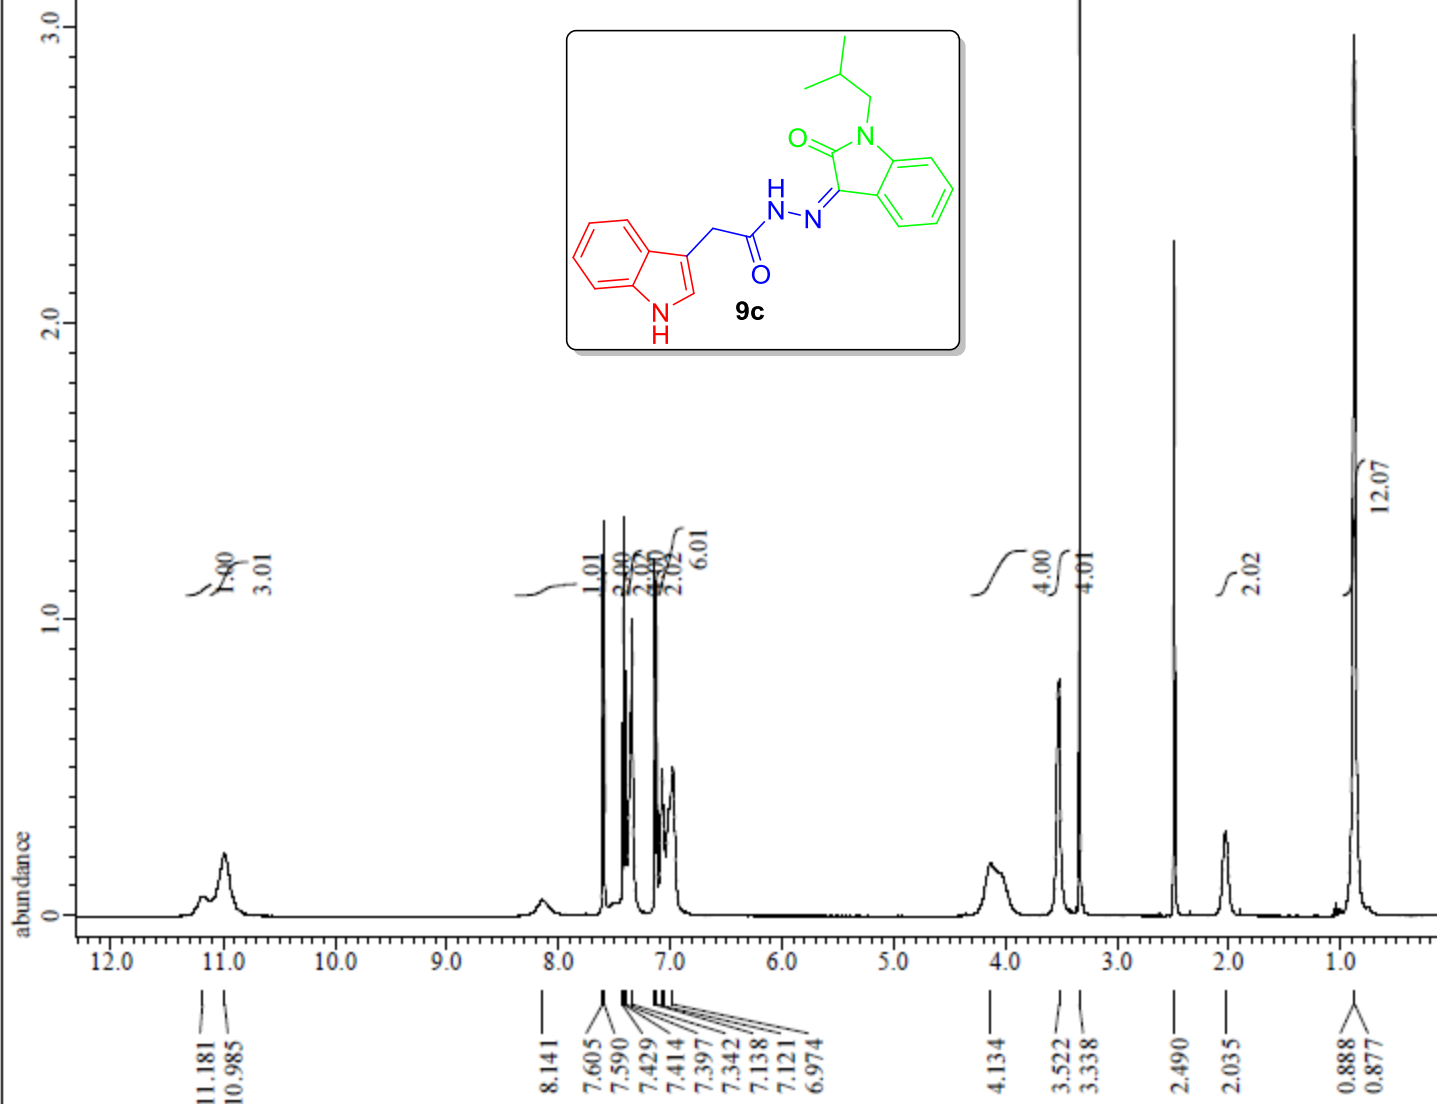

X : parts per Million : Proton

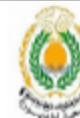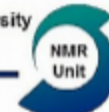

Filename = Dr.Wagdy Mohammed\_3H\_isc  
Author = delta  
Experiment = carbon.jxp  
Sample\_Id = Dr.Wagdy Mohammed\_3H\_isc  
Solvent = DMSO-D6  
Creation\_Time = 25-SEP-2019 02:48:45  
Revision\_Time = 25-SEP-2019 09:25:27  
Current\_Time = 25-SEP-2019 09:28:42

Comment = single pulse decoupled g  
Data\_Format = 1D REAL  
Dim\_Size = 26214  
Dim\_Title = Carbon13  
Dim\_Units = [ppm]  
Dimensions = X  
Site = JNM-ECA500II  
Spectrometer = DELTA2\_NMR

Field\_Strength = 11.7473579[T] (500[MHz])  
X\_Acq\_Duration = 0.83361792[s]  
X\_Domain = 13C  
X\_Freq = 125.76529768[MHz]  
X\_Offset = 100[ppm]  
X\_Points = 32768  
X\_Prescans = 4  
X\_Resolution = 1.19959034[Hz]  
X\_Sweep = 39.3081761[kHz]  
X\_Sweep\_Clipped = 31.44654088[kHz]  
Irr\_Domain = Proton  
Irr\_Freq = 500.15991521[MHz]  
Irr\_Offset = 5.0[ppm]  
Clipped = FALSE  
Scans = 3700  
Total\_Scans = 3700

Relaxation\_Delay = 2[s]  
Recvr\_Gain = 56  
Temp\_Get = 18.8[dC]  
X\_90\_Width = 52.78[us]  
X\_Acq\_Time = 0.83361792[s]  
X\_Angle = 30[deg]  
X\_Atn = 9.7[dB]  
X\_Pulse = 17.59333333[us]  
Irr\_Atn\_Dec = 20.948[dB]  
Irr\_Atn\_Noce = 20.948[dB]  
Irr\_Noise = WALTZ  
Irr\_Pwidth = 92[us]  
Decoupling = TRUE  
Initial\_Wait = 1[s]  
Noe = TRUE  
Noe\_Time = 2[s]  
Repetition\_Time = 2.83361792[s]

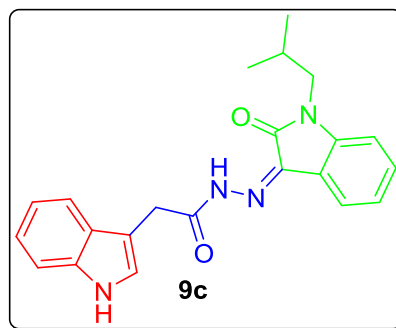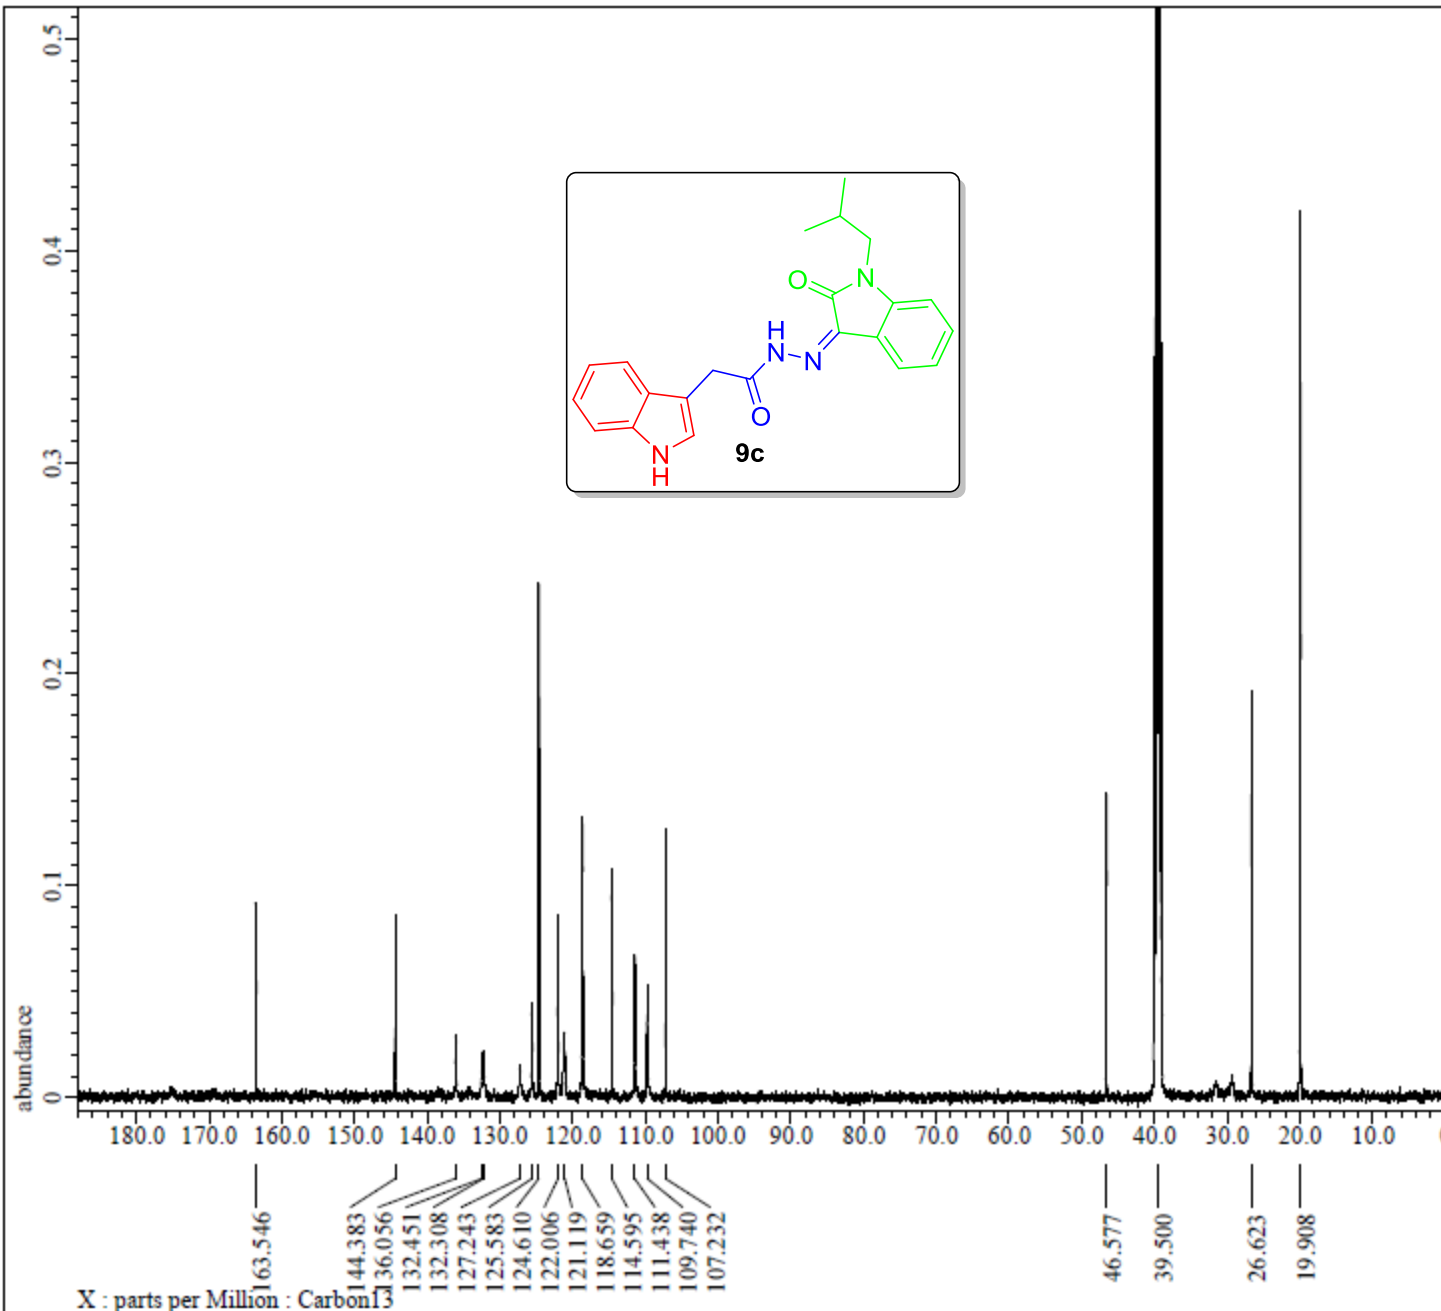

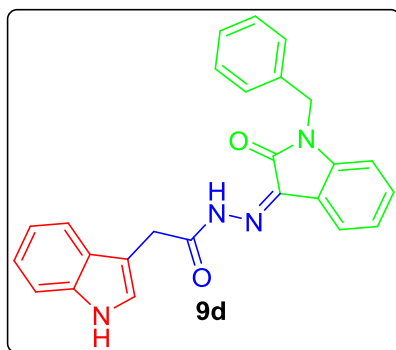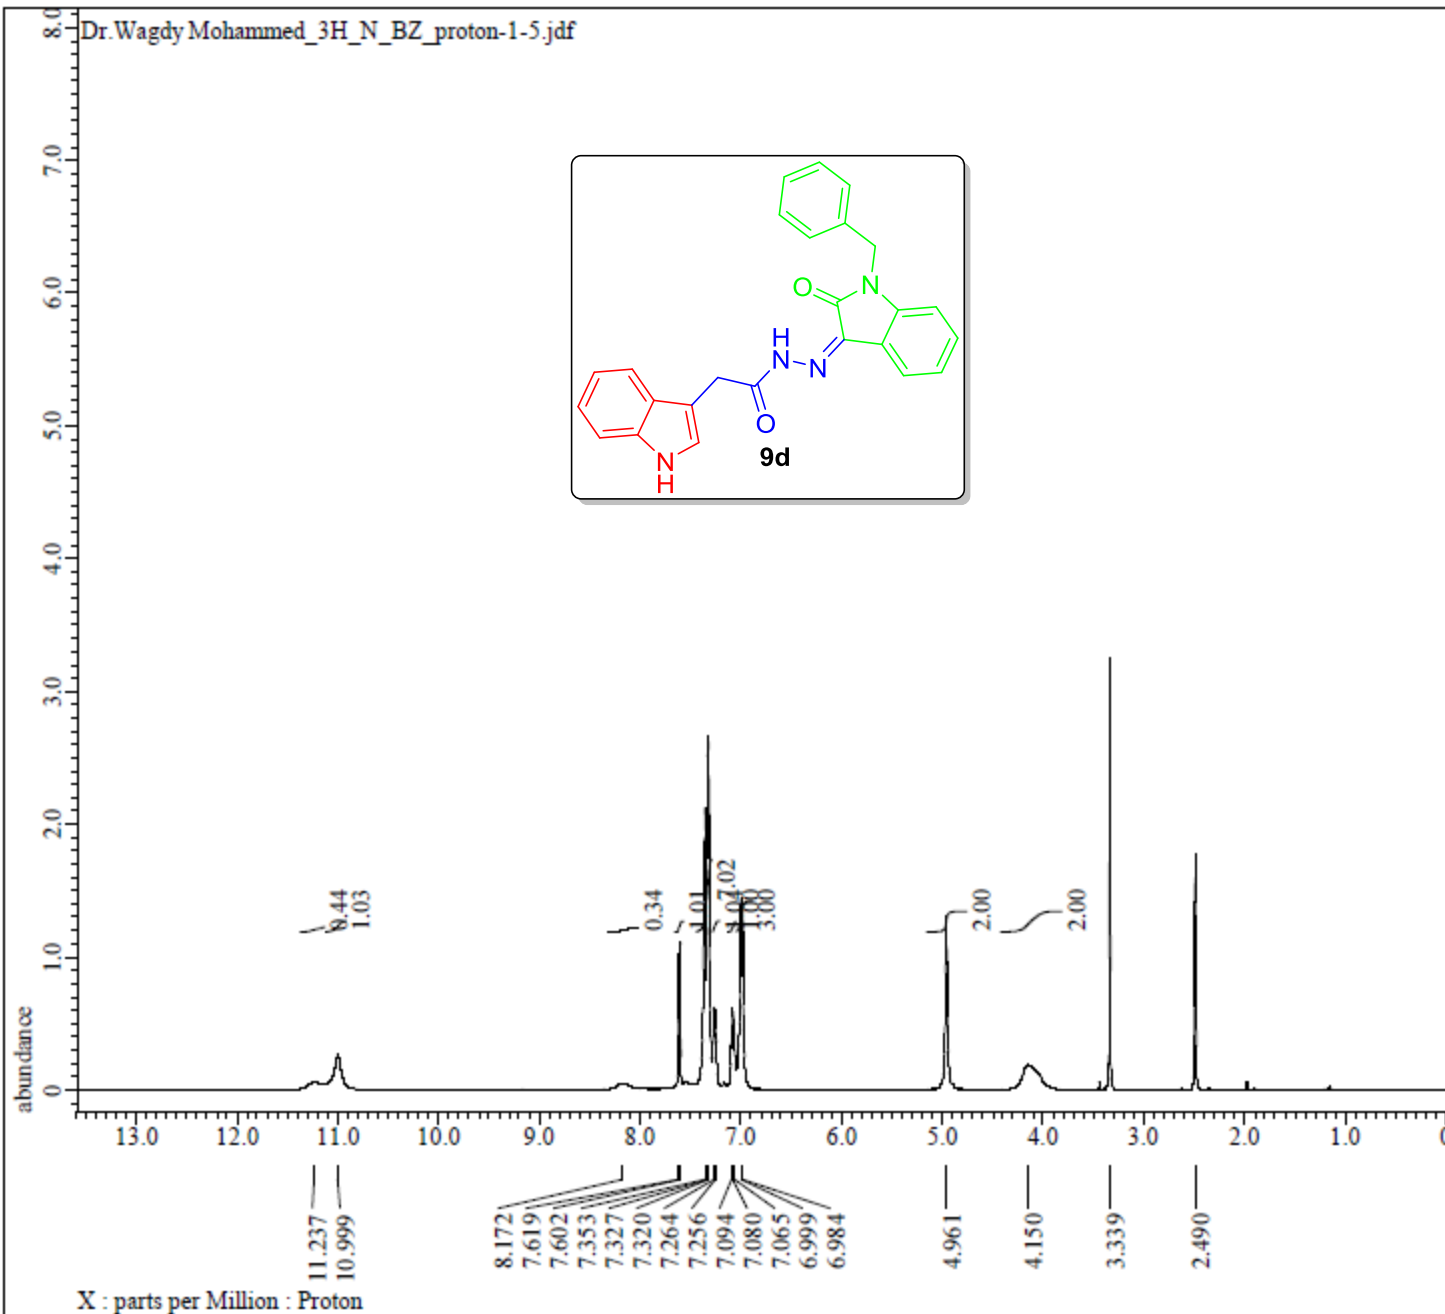

Filename = Dr.Wagdy Mohammed\_3H\_N  
 Author = delta  
 Experiment = proton.jxp  
 Sample\_Id = Dr.Wagdy Mohammed\_3H\_N  
 Solvent = DMSO-D6  
 Creation\_Time = 23-SEP-2019 11:28:22  
 Revision\_Time = 25-SEP-2019 10:35:45  
 Current\_Time = 25-SEP-2019 10:35:51

Comment = single\_pulse  
 Data\_Format = 1D\_COMPLEX  
 Dim\_Size = 13107  
 Dim\_Title = Proton  
 Dim\_Units = [ppm]  
 Dimensions = X  
 Site = JNM-ECA500II  
 Spectrometer = DELTA2\_NMR

Field\_Strength = 11.7473579[T] (500[MHz])  
 X\_Acq\_Duration = 1.4548992[s]  
 X\_Domain = 1H  
 X\_Freq = 500.15991521[MHz]  
 X\_Offset = 6[ppm]  
 X\_Points = 16384  
 X\_Prescans = 1  
 X\_Resolution = 0.68733284[Hz]  
 X\_Sweep = 11.26126126[kHz]  
 X\_Sweep\_Clipped = 9.00900901[kHz]  
 Irr\_Domain = Proton  
 Irr\_Freq = 500.15991521[MHz]  
 Irr\_Offset = 5.0[ppm]  
 Tri\_Domain = Proton  
 Tri\_Freq = 500.15991521[MHz]  
 Tri\_Offset = 5.0[ppm]  
 Clipped = FALSE  
 Scans = 40  
 Total\_Scans = 40

Relaxation\_Delay = 5[s]  
 Recvr\_Gain = 42  
 Temp\_Get = 21.5[dC]  
 X\_90\_Width = 14.5[us]  
 X\_Acq\_Time = 1.4548992[s]  
 X\_Angle = 45[deg]  
 X\_Atn = 4.9[dB]  
 X\_Pulse = 7.25[us]  
 Irr\_Mode = Off  
 Tri\_Mode = Off  
 Dante\_Presat = FALSE  
 Initial\_Wait = 1[s]  
 Repetition\_Time = 6.4548992[s]

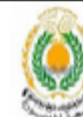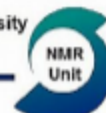

Filename = Dr.Wagdy Mohammed\_3H\_N\_BZ\_carbon-1-6.jdf  
 Author = delta  
 Experiment = carbon.jxp  
 Sample Id = Dr.Wagdy Mohammed\_3H\_N\_BZ\_carbon-1-6.jdf  
 Solvent = DMSO-D6  
 Creation Time = 23-SEP-2019 21:03:23  
 Revision Time = 24-SEP-2019 12:45:31  
 Current Time = 24-SEP-2019 12:46:17

Comment = single pulse decoupled  
 Data Format = 1D COMPLEX  
 Dim Size = 26214  
 Dim Title = Carbon13  
 Dim Units = [ppm]  
 Dimensions = X  
 Site = JNM-ECA500II  
 Spectrometer = DELTA2\_NMR

Field Strength = 11.7473579 [T] (500[MHz])  
 X\_Acq\_Duration = 0.83361792 [s]  
 X\_Domain = 13C  
 X\_Freq = 125.76529768 [MHz]  
 X\_Offset = 100 [ppm]  
 X\_Points = 32768  
 X\_Prescans = 4  
 X\_Resolution = 1.19959034 [Hz]  
 X\_Sweep = 39.3081761 [kHz]  
 X\_Sweep\_Clipped = 31.44654088 [kHz]  
 Irr\_Domain = Proton  
 Irr\_Freq = 500.15991521 [MHz]  
 Irr\_Offset = 5.0 [ppm]  
 Clipped = FALSE  
 Scans = 3700  
 Total\_Scans = 3700

Relaxation\_Delay = 2 [s]  
 Recvr\_Gain = 58  
 Temp\_Get = 18.6 [dC]  
 X\_90\_Width = 52.78 [us]  
 X\_Acq\_Time = 0.83361792 [s]  
 X\_Angle = 30 [deg]  
 X\_Atn = 9.7 [dB]  
 X\_Pulse = 17.59333333 [us]  
 Irr\_Atn\_Dec = 20.948 [dB]  
 Irr\_Atn\_Noise = 20.948 [dB]  
 Irr\_Noise = WALTZ  
 Irr\_Pwidth = 92 [us]  
 Decoupling = TRUE  
 Initial\_Wait = 1 [s]  
 Noe = TRUE  
 Noe\_Time = 2 [s]  
 Repetition\_Time = 2.83361792 [s]

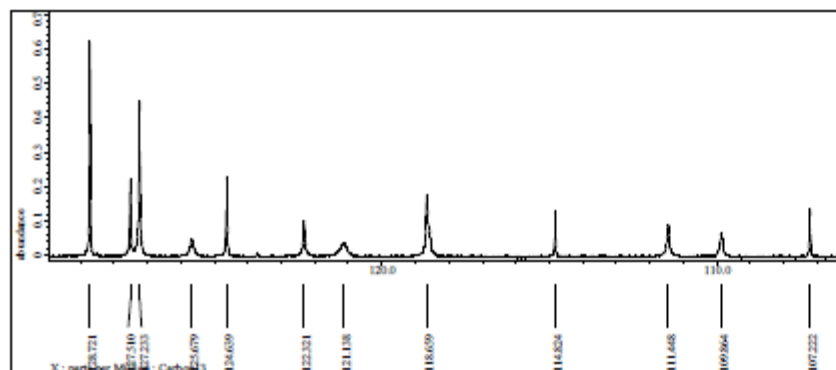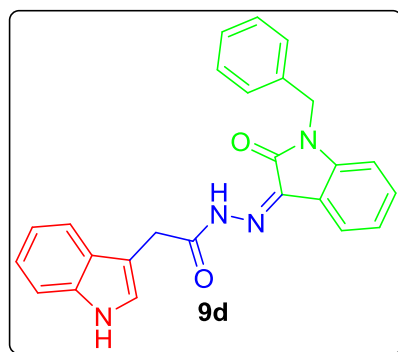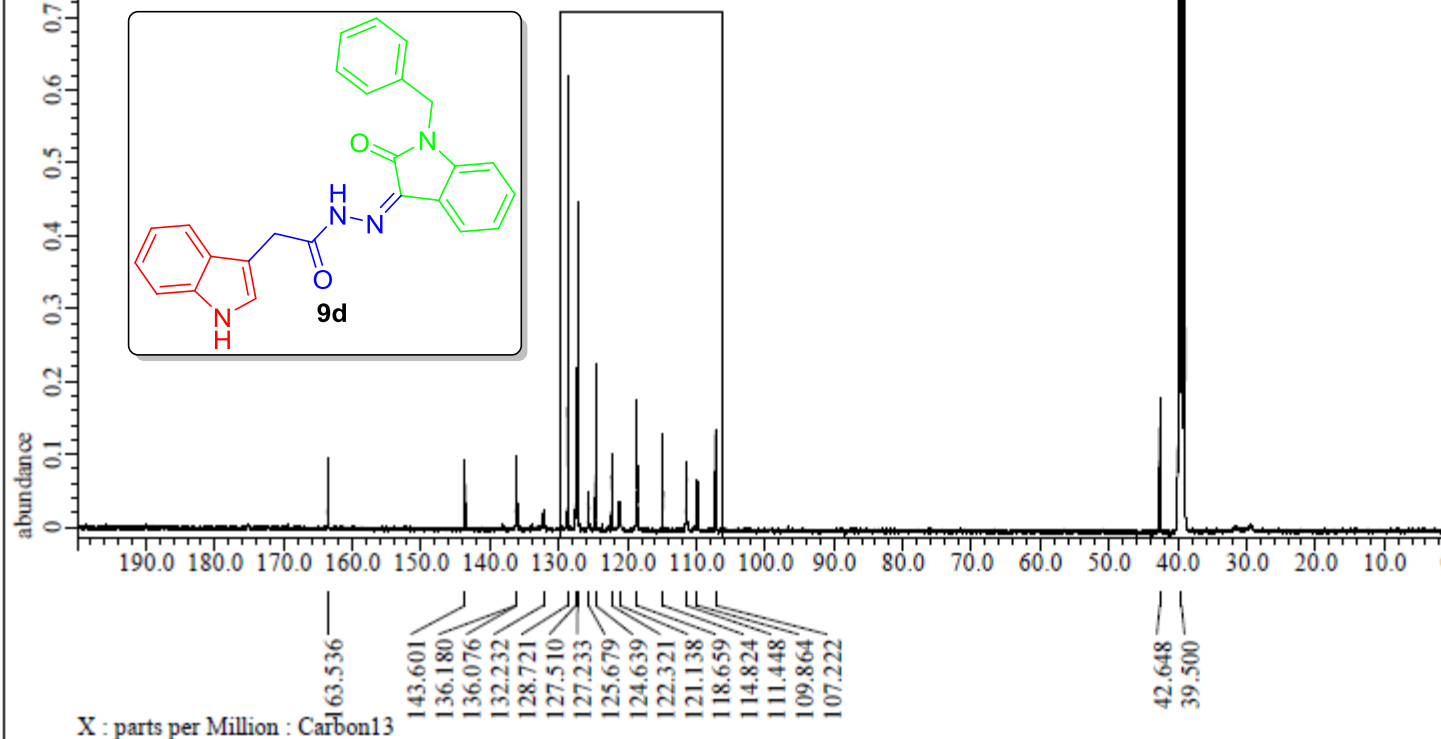

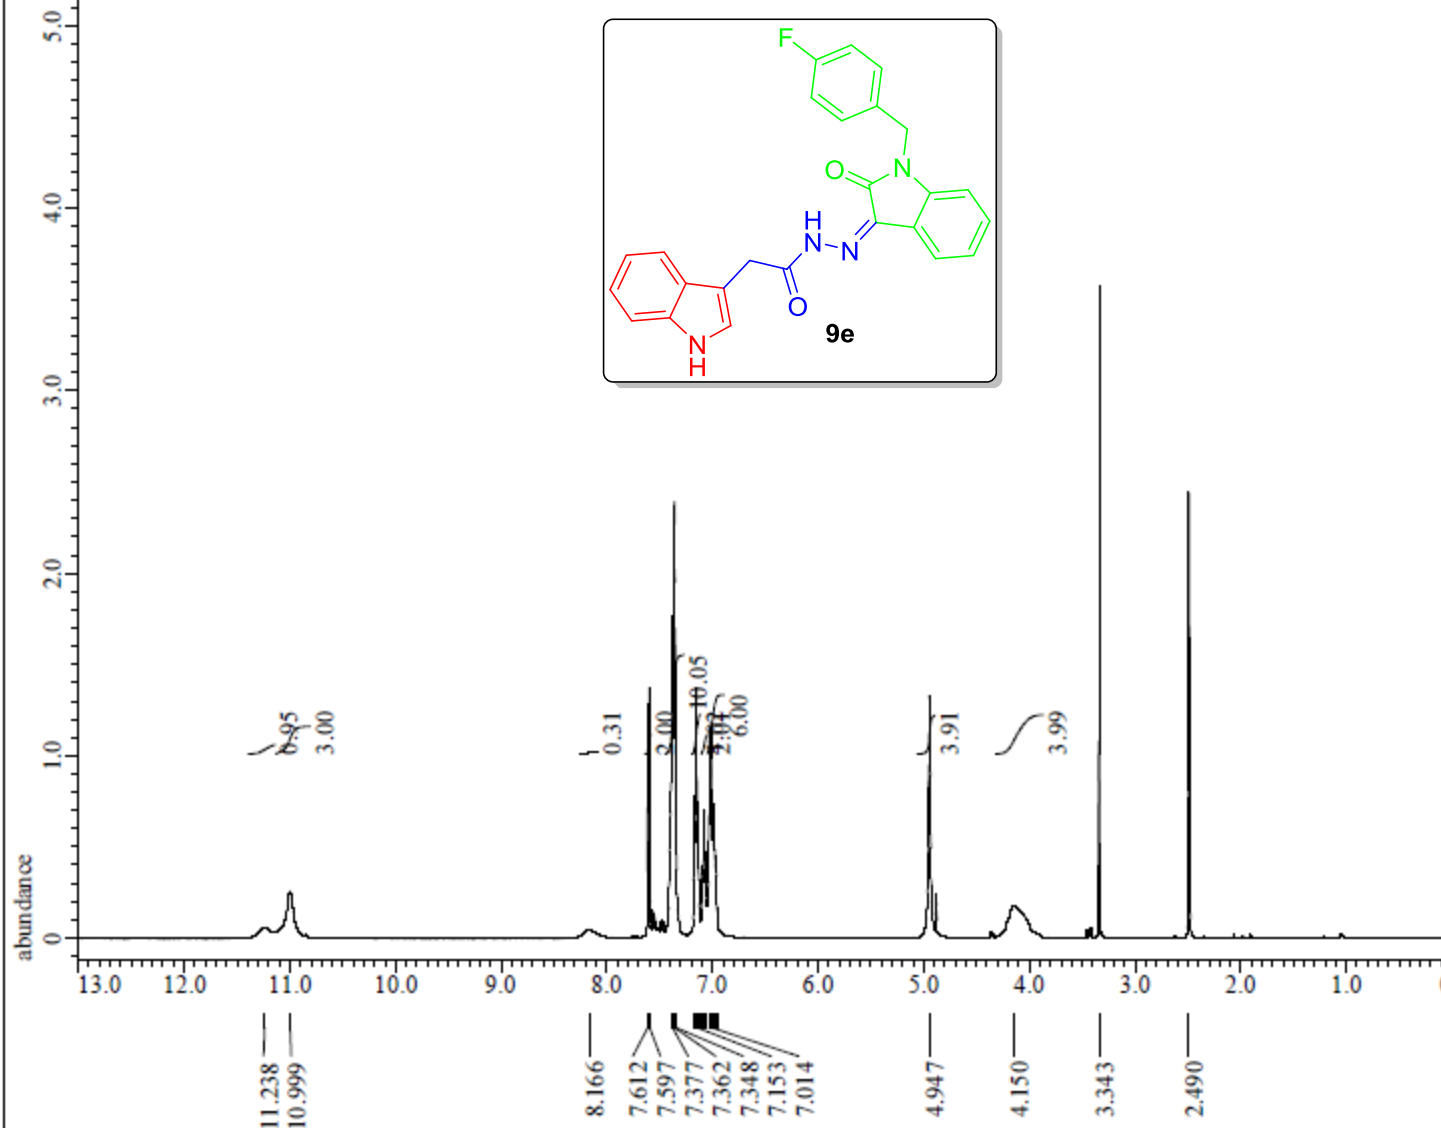

X : parts per Million : Proton

Filename = Dr. Wagdy Mohamd\_3H-4FBz  
 Author = delta  
 Experiment = proton.jxp  
 Sample\_Id = Dr. Wagdy Mohamd\_3H-4FBz  
 Solvent = DMSO-D6  
 Creation\_Time = 17-SEP-2019 14:55:04  
 Revision\_Time = 17-SEP-2019 14:37:29  
 Current\_Time = 17-SEP-2019 14:37:55

Comment = single\_pulse  
 Data\_Format = 1D\_COMPLEX  
 Dim\_Size = 13107  
 Dim\_Title = Proton  
 Dim\_Units = [ppm]  
 Dimensions = X  
 Site = JNM-ECA500II  
 Spectrometer = DELTA2\_NMR

Field\_Strength = 11.7473579[T] (500[MHz])  
 X\_Acq\_Duration = 1.4548992[s]  
 X\_Domain = 1H  
 X\_Freq = 500.15991521[MHz]  
 X\_Offset = 6[ppm]  
 X\_Points = 16384  
 X\_Prescans = 1  
 X\_Resolution = 0.68733284[Hz]  
 X\_Sweep = 11.26126126[kHz]  
 X\_Sweep\_Clipped = 9.00900901[kHz]  
 Irr\_Domain = Proton  
 Irr\_Freq = 500.15991521[MHz]  
 Irr\_Offset = 5.0[ppm]  
 Tri\_Domain = Proton  
 Tri\_Freq = 500.15991521[MHz]  
 Tri\_Offset = 5.0[ppm]  
 Clipped = FALSE  
 Scans = 40  
 Total\_Scans = 40

Relaxation\_Delay = 5[s]  
 Recvr\_Gain = 42  
 Temp\_Get = 20[dC]  
 X\_90\_Width = 14.5[us]  
 X\_Acq\_Time = 1.4548992[s]  
 X\_Angle = 45[deg]  
 X\_Atn = 4.9[dB]  
 X\_Pulse = 7.25[us]  
 Irr\_Mode = Off  
 Tri\_Mode = Off  
 Dante\_Preset = FALSE  
 Initial\_Wait = 1[s]  
 Repetition\_Time = 6.4548992[s]



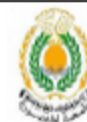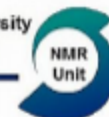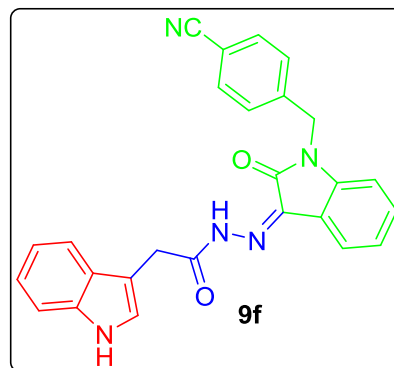

Filename = Dr.Wagdy Mohammed\_3H\_N\_  
 Author = delta  
 Experiment = proton.jxp  
 Sample\_Id = Dr.Wagdy Mohammed\_3H\_N\_  
 Solvent = DMSO-D6  
 Creation\_Time = 23-SEP-2019 12:02:28  
 Revision\_Time = 26-SEP-2019 13:50:57  
 Current\_Time = 26-SEP-2019 13:51:02

Comment = single pulse  
 Data\_Format = 1D COMPLEX  
 Dim\_Size = 13107  
 Dim\_Title = Proton  
 Dim\_Units = [ppm]  
 Dimensions = X  
 Site = JNM-ECA500II  
 Spectrometer = DELTA2\_NMR

Field\_Strength = 11.7473579 [T] (500 [MHz])  
 X\_Acq\_Duration = 1.4548992 [s]  
 X\_Domain = 1H  
 X\_Freq = 500.15991521 [MHz]  
 X\_Offset = 6 [ppm]  
 X\_Points = 16384  
 X\_Prescans = 1  
 X\_Resolution = 0.68733284 [Hz]  
 X\_Sweep = 11.26126126 [kHz]  
 X\_Sweep\_Clippped = 9.00900901 [kHz]  
 Irr\_Domain = Proton  
 Irr\_Freq = 500.15991521 [MHz]  
 Irr\_Offset = 5.0 [ppm]  
 Tri\_Domain = Proton  
 Tri\_Freq = 500.15991521 [MHz]  
 Tri\_Offset = 5.0 [ppm]  
 Clipped = FALSE  
 Scans = 40  
 Total\_Scans = 40

Relaxation\_Delay = 5 [s]  
 Recvr\_Gain = 40  
 Temp\_Get = 21 [dC]  
 X\_90\_Width = 14.5 [us]  
 X\_Acq\_Time = 1.4548992 [s]  
 X\_Angle = 45 [deg]  
 X\_Atn = 4.9 [dB]  
 X\_Pulse = 7.25 [us]  
 Irr\_Mode = Off  
 Tri\_Mode = Off  
 Dante\_Presat = FALSE  
 Initial\_Wait = 1 [s]  
 Repetition\_Time = 6.4548992 [s]

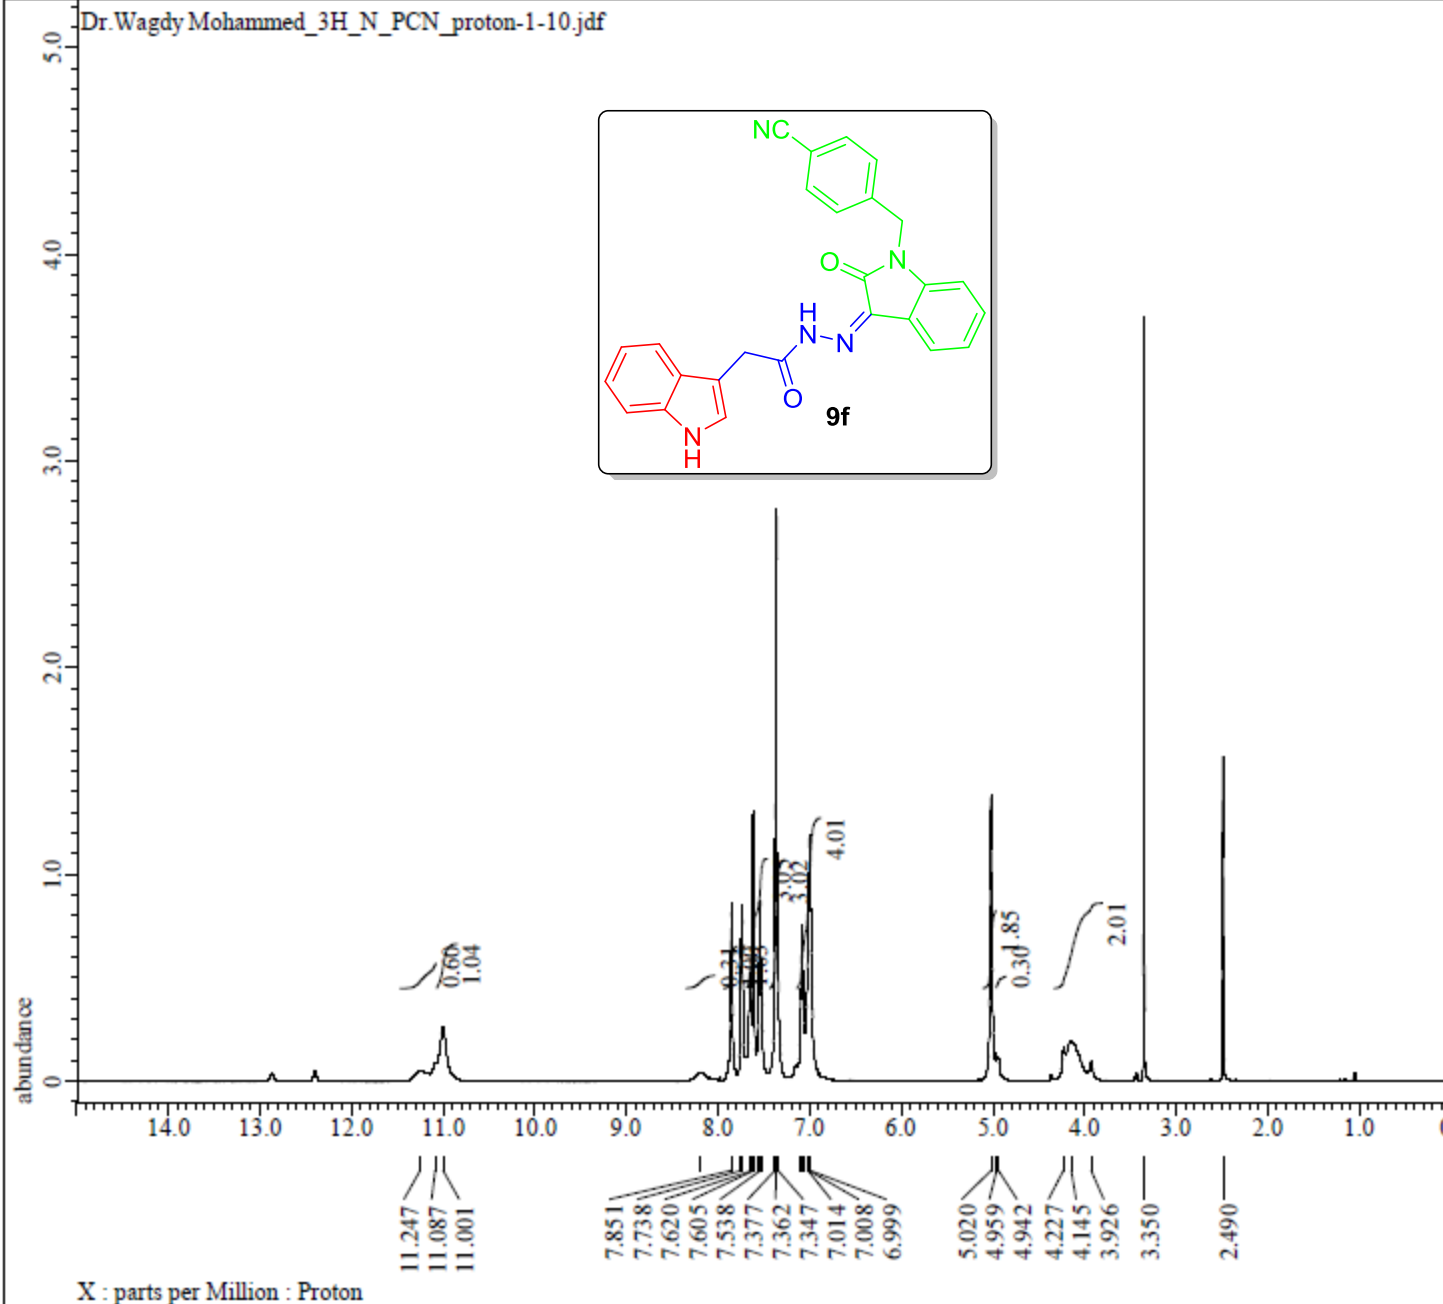



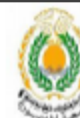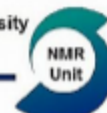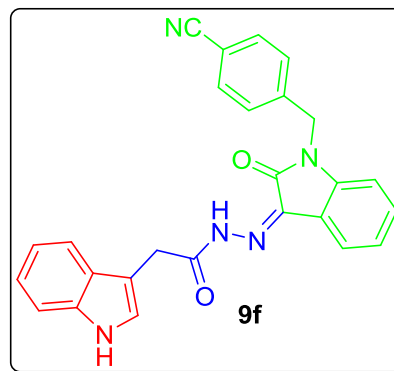

Filename = Dr.Wagdy Mohammed\_3H\_N\_1  
 Author = delta  
 Experiment = carbon.jxp  
 Sample\_Id = Dr.Wagdy Mohammed\_3H\_N\_1  
 Solvent = DMSO-D6  
 Creation\_Time = 24-SEP-2019 06:14:19  
 Revision\_Time = 24-SEP-2019 12:59:14  
 Current\_Time = 24-SEP-2019 13:00:02

Comment = single pulse decoupled  
 Data Format = 1D COMPLEX  
 Dim\_Size = 26214  
 Dim\_Title = Carbon13  
 Dim\_Units = [ppm]  
 Dimensions = X  
 Site = JNM-ECA500II  
 Spectrometer = DELTA2\_NMR

Field\_Strength = 11.7473579[T] (500[MHz])  
 X\_Acq\_Duration = 0.83361792[s]  
 X\_Domain = 13C  
 X\_Freq = 125.76529768[MHz]  
 X\_Offset = 100[ppm]  
 X\_Points = 32768  
 X\_Prescans = 4  
 X\_Resolution = 1.19959034[Hz]  
 X\_Sweep = 39.3081761[kHz]  
 X\_Sweep\_Clippped = 31.44654088[kHz]  
 Irr\_Domain = Proton  
 Irr\_Freq = 500.15991521[MHz]  
 Irr\_Offset = 5.0[ppm]  
 Clipped = TRUE  
 Scans = 3700  
 Total\_Scans = 3700

Relaxation\_Delay = 2[s]  
 Recvr\_Gain = 58  
 Temp\_Get = 19.7[dc]  
 X\_90\_Width = 52.78[us]  
 X\_Acq\_Time = 0.83361792[s]  
 X\_Angle = 30[deg]  
 X\_Atn = 9.7[dB]  
 X\_Pulse = 17.59333333[us]  
 Irr\_Atn\_Dec = 20.948[dB]  
 Irr\_Atn\_No = 20.948[dB]  
 Irr\_Noise = WALTZ  
 Irr\_Pwidth = 92[us]  
 Decoupling = TRUE  
 Initial\_Wait = 1[s]  
 Noe = TRUE  
 Noe\_Time = 2[s]  
 Repetition\_Time = 2.83361792[s]

abundance

200.0 190.0 180.0 170.0 160.0 150.0 140.0 130.0 120.0 110.0 100.0 90.0 80.0 70.0 60.0 50.0 40.0 30.0 20.0 10.0 0

163.670  
 160.789  
 143.315  
 142.323  
 137.955  
 132.098  
 131.402  
 130.906  
 129.981  
 129.895  
 124.639  
 123.275  
 122.455  
 118.630  
 115.015  
 111.619  
 111.457  
 109.683  
 107.213

42.018  
 41.761  
 39.500

X : parts per Million : Carbon13

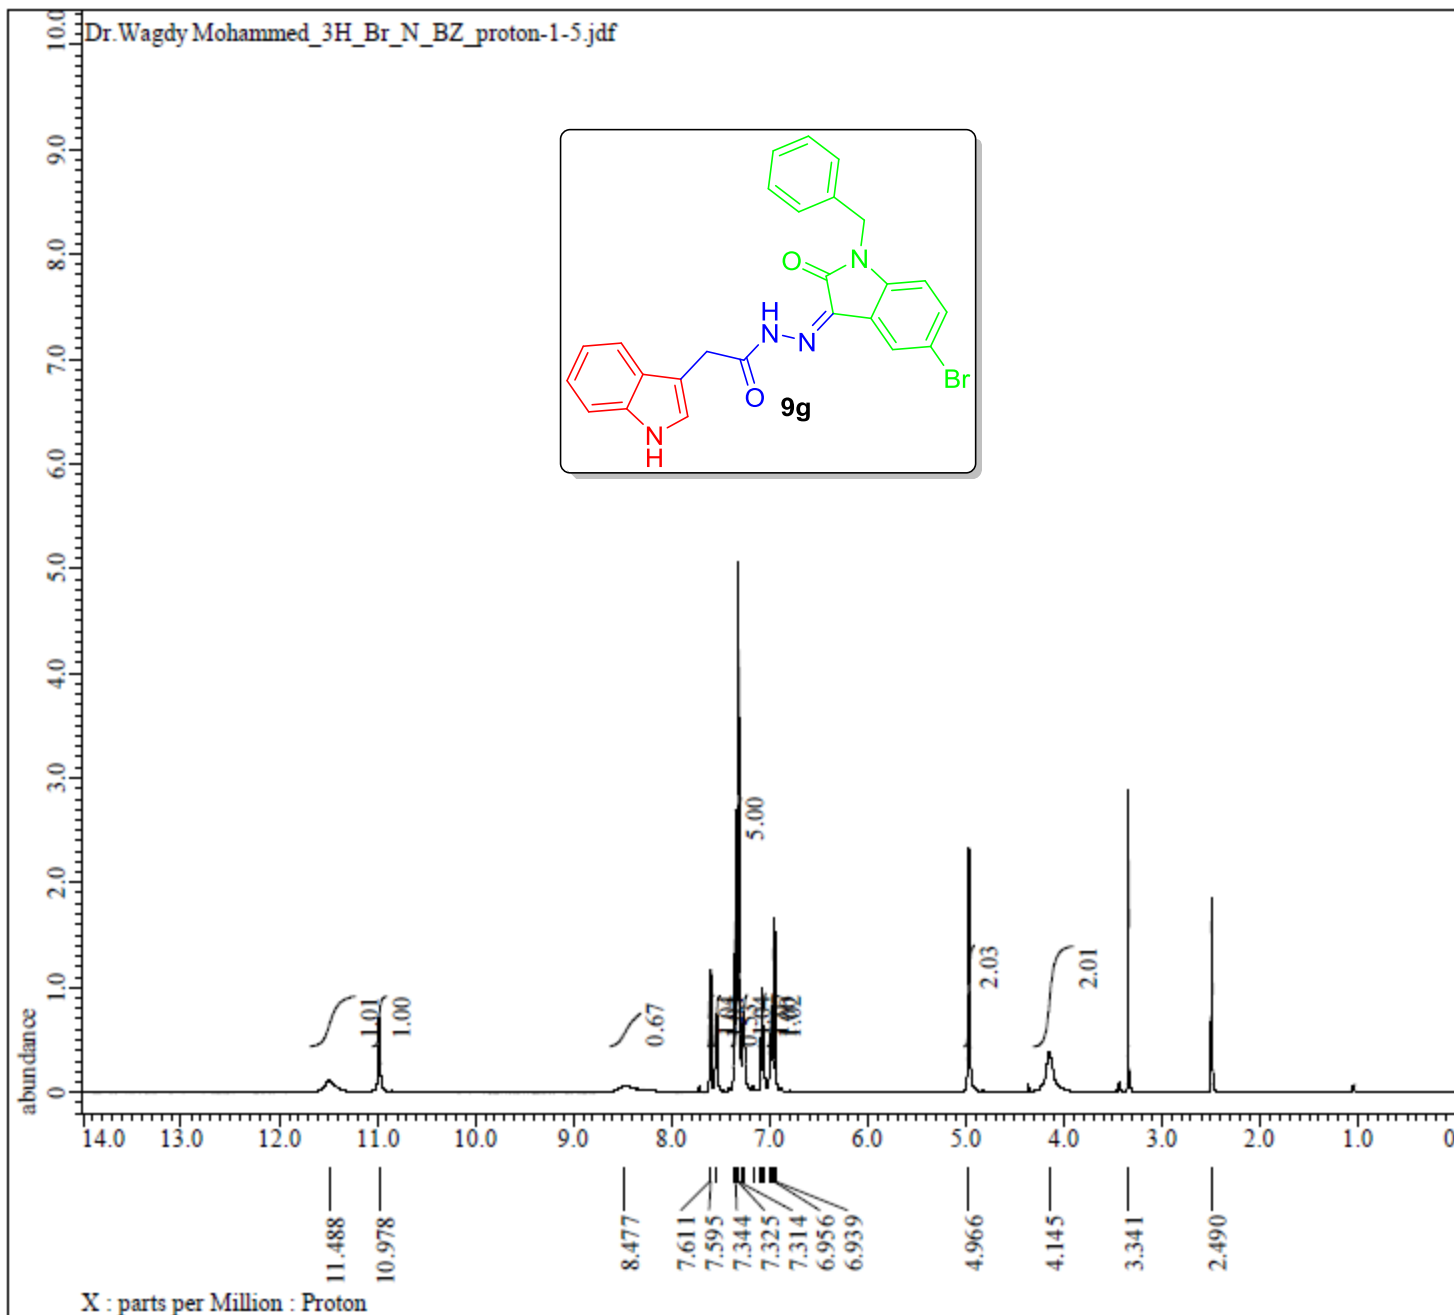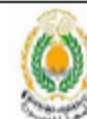

Mansoura University

JEOL

ECA- 500 II

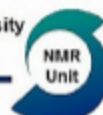

Filename = Dr.Wagdy Mohammed\_3H\_Br\_N\_BZ\_proton-1-5.jdf  
 Author = delta  
 Experiment = proton.jxp  
 Sample\_Id = Dr.Wagdy Mohammed\_3H\_Br\_N\_BZ\_proton-1-5.jdf  
 Solvent = DMSO-D6  
 Creation\_Time = 23-SEP-2019 11:51:01  
 Revision\_Time = 17-OCT-2019 14:15:57  
 Current\_Time = 17-OCT-2019 14:16:04

Comment = single\_pulse  
 Data\_Format = 1D\_COMPLEX  
 Dim\_Size = 26214  
 Dim\_Title = Proton  
 Dim\_Units = [ppm]  
 Dimensions = X  
 Site = JNM-ECA500II  
 Spectrometer = DELTA2\_NMR

Field\_Strength = 11.7473579[T] (500[MHz])  
 X\_Acq\_Duration = 1.4548992[s]  
 X\_Domain = 1H  
 X\_Freq = 500.15991521[MHz]  
 X\_Offset = 6[ppm]  
 X\_Points = 16384  
 X\_Prescans = 1  
 X\_Resolution = 0.68733284[Hz]  
 X\_Sweep = 11.26126126[kHz]  
 X\_Sweep\_Clipped = 9.00900901[kHz]  
 Irr\_Domain = Proton  
 Irr\_Freq = 500.15991521[MHz]  
 Irr\_Offset = 5.0[ppm]  
 Tri\_Domain = Proton  
 Tri\_Freq = 500.15991521[MHz]  
 Tri\_Offset = 5.0[ppm]  
 Clipped = FALSE  
 Scans = 40  
 Total\_Scans = 40

Relaxation\_Delay = 5[s]  
 Recvr\_Gain = 42  
 Temp\_Get = 21[dC]  
 X\_90\_Width = 14.5[us]  
 X\_Acq\_Time = 1.4548992[s]  
 X\_Angle = 45[deg]  
 X\_Atn = 4.9[dB]  
 X\_Pulse = 7.25[us]  
 Irr\_Mode = Off  
 Tri\_Mode = Off  
 Dante\_Presat = FALSE  
 Initial\_Wait = 1[s]  
 Repetition\_Time = 6.4548992[s]

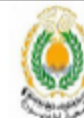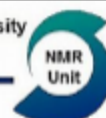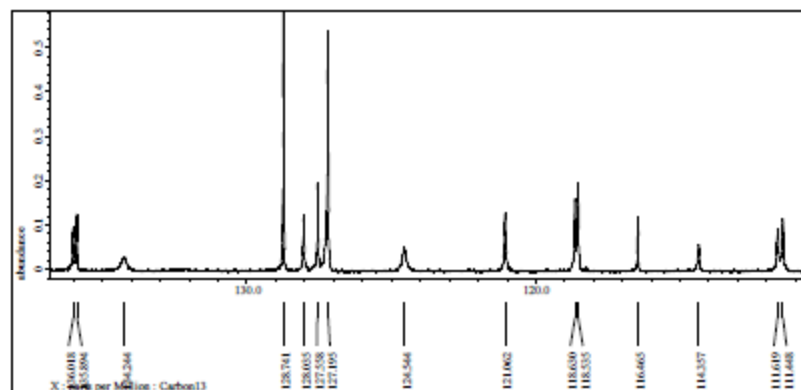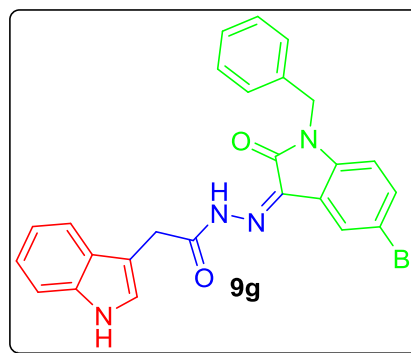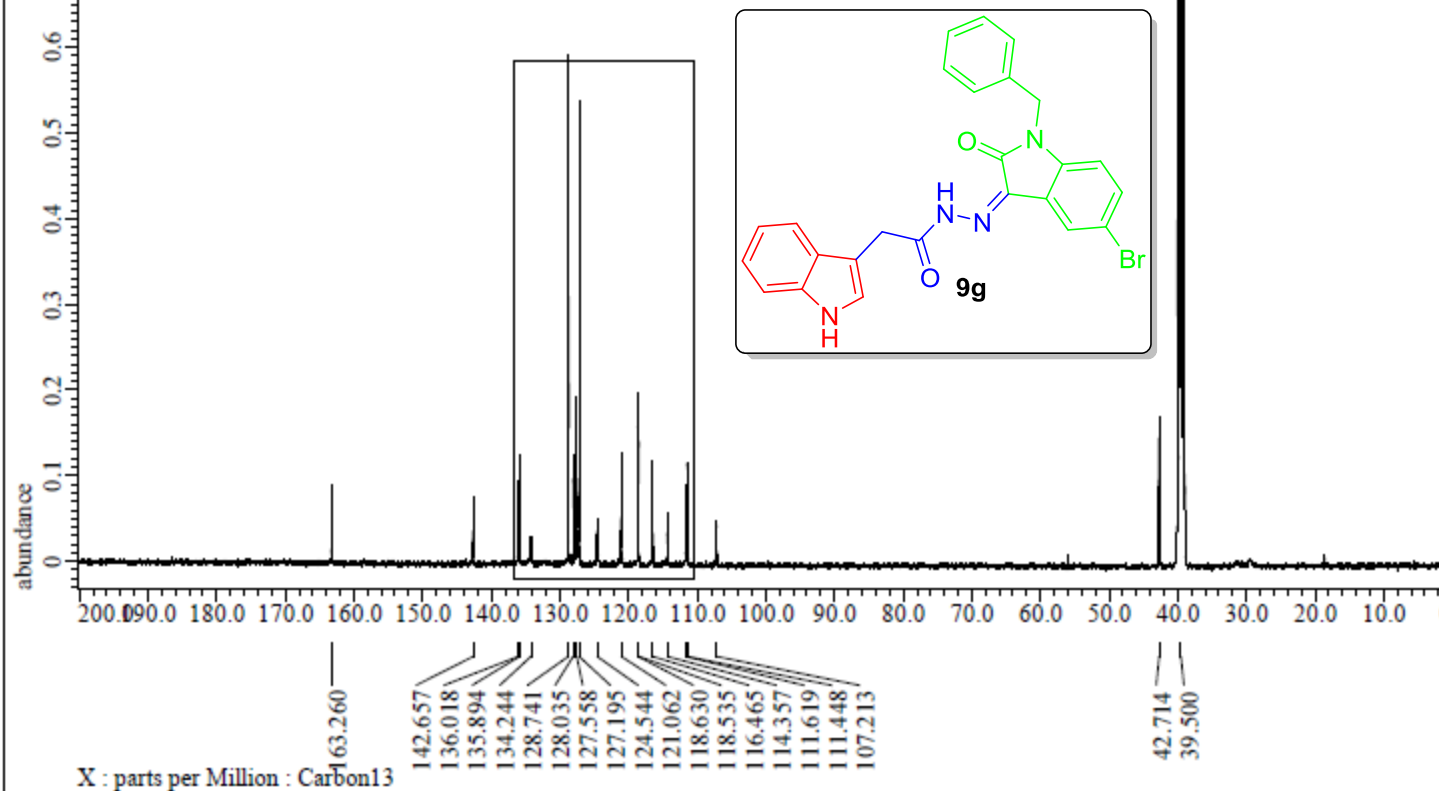

Filename = Dr.Wagdy Mohammed\_3H\_Br  
 Author = delta  
 Experiment = carbon.jxp  
 Sample Id = Dr.Wagdy Mohammed\_3H\_Br  
 Solvent = DMSO-D6  
 Creation Time = 24-SEP-2019 03:09:35  
 Revision Time = 24-SEP-2019 12:51:49  
 Current Time = 24-SEP-2019 12:52:22  
 Comment = single pulse decoupled  
 Data Format = 1D COMPLEX  
 Dim\_Size = 26214  
 Dim\_Title = Carbon13  
 Dim\_Units = [ppm]  
 Dimensions = X  
 Site = JNM-ECA500II  
 Spectrometer = DELTA2\_NMR  
 Field Strength = 11.7473579 [T] (500[MHz])  
 X\_Acq\_Duration = 0.83361792 [s]  
 X\_Domain = 13C  
 X\_Freq = 125.76529768 [MHz]  
 X\_Offset = 100 [ppm]  
 X\_Points = 32768  
 X\_Prescans = 4  
 X\_Resolution = 1.19959034 [Hz]  
 X\_Sweep = 39.3081761 [kHz]  
 X\_Sweep\_Clipped = 31.44654088 [kHz]  
 Irr\_Domain = Proton  
 Irr\_Freq = 500.15991521 [MHz]  
 Irr\_Offset = 5.0 [ppm]  
 Clipped = TRUE  
 Scans = 3700  
 Total\_Scans = 3700  
 Relaxation\_Delay = 2 [s]  
 Recvr\_Gain = 58  
 Temp\_Get = 18.9 [dC]  
 X\_90\_Width = 52.78 [us]  
 X\_Acq\_Time = 0.83361792 [s]  
 X\_Angle = 30 [deg]  
 X\_Atn = 9.7 [dB]  
 X\_Pulse = 17.59333333 [us]  
 Irr\_Atn\_Dec = 20.948 [dB]  
 Irr\_Atn\_Noise = 20.948 [dB]  
 Irr\_Noise = WALTZ  
 Irr\_Pwidth = 92 [us]  
 Decoupling = TRUE  
 Initial\_Wait = 1 [s]  
 Noe = TRUE  
 Noe\_Time = 2 [s]  
 Repetition\_Time = 2.83361792 [s]

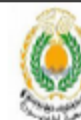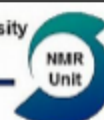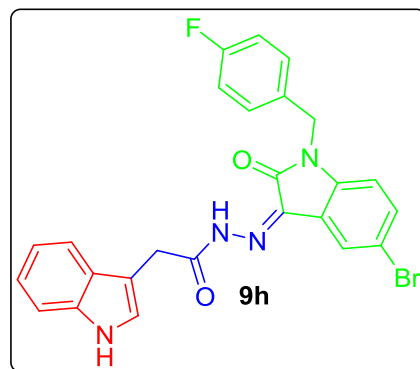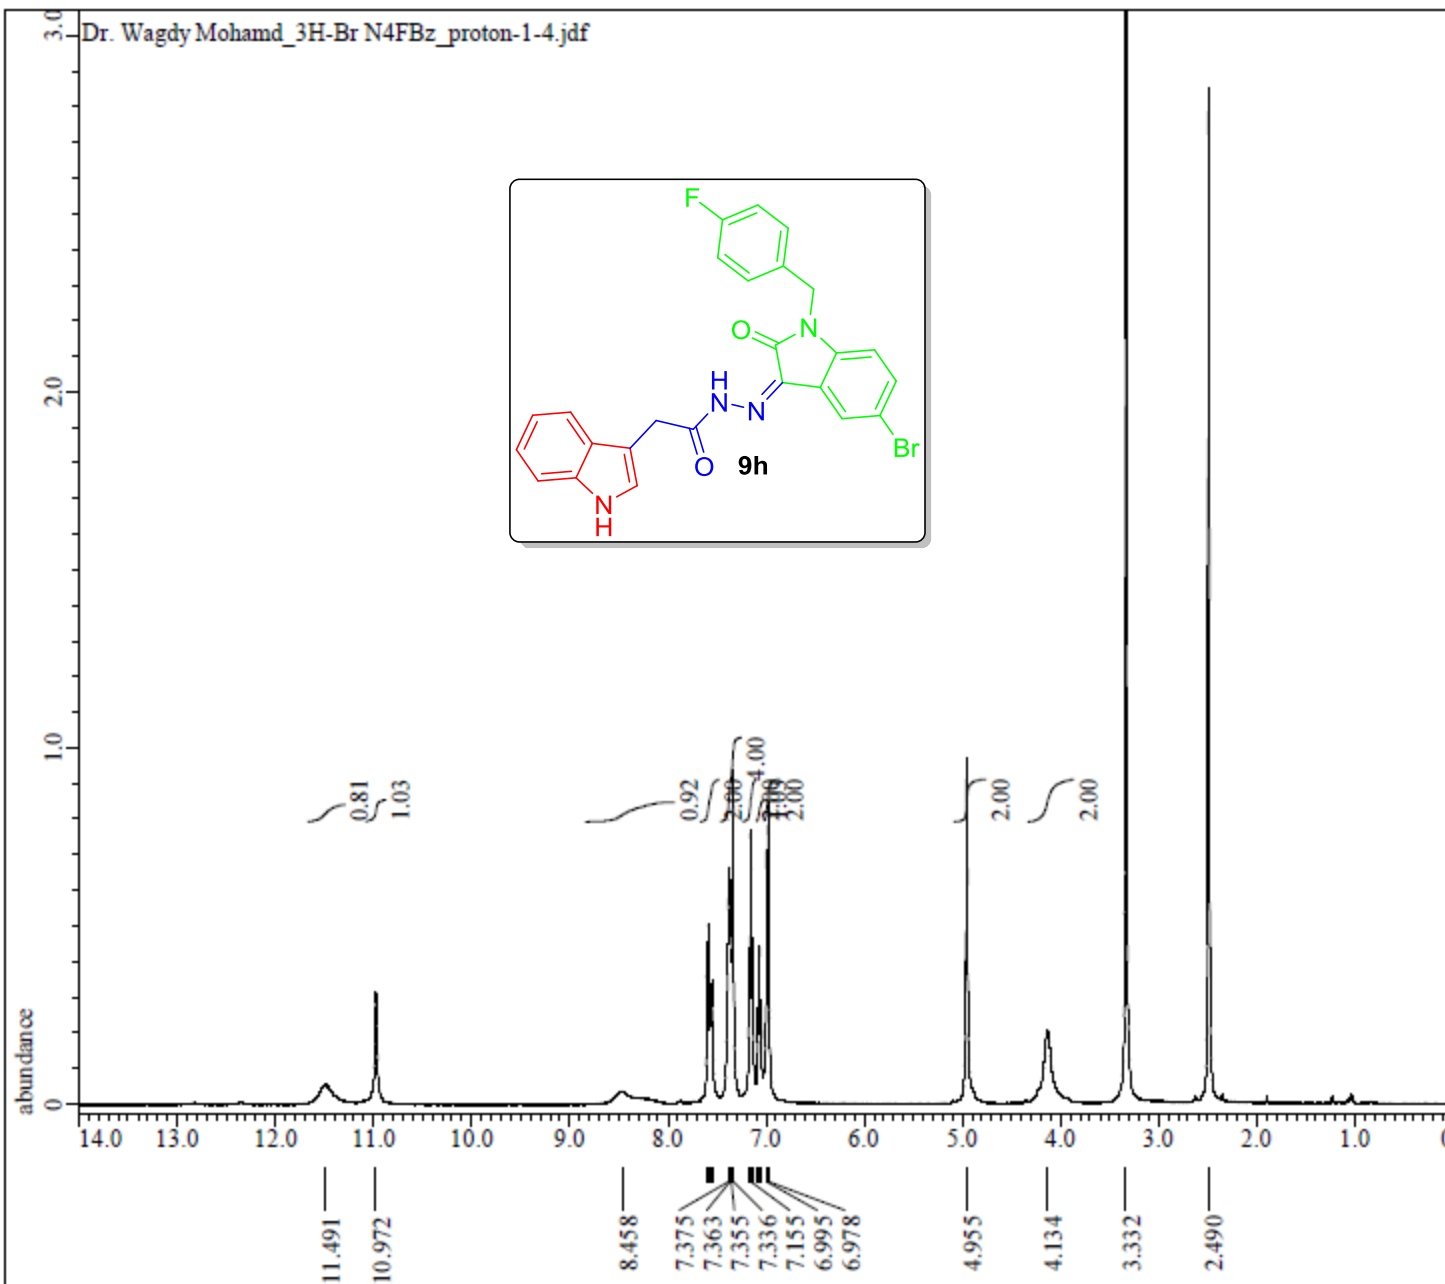

X : parts per Million : Proton

Filename = Dr. Wagdy Mohamd\_3H-Br 1  
 Author = delta  
 Experiment = proton.jxp  
 Sample Id = Dr. Wagdy Mohamd\_3H-Br 1  
 Solvent = DMSO-D6  
 Creation Time = 17-SEP-2019 15:23:50  
 Revision Time = 17-SEP-2019 15:55:40  
 Current Time = 17-SEP-2019 15:55:46  
 Comment = single\_pulse  
 Data Format = 1D COMPLEX  
 Dim Size = 13107  
 Dim Title = Proton  
 Dim Units = [ppm]  
 Dimensions = X  
 Site = JNM-ECA500II  
 Spectrometer = DELTA2 NMR  
 Field Strength = 11.7473579 [T] (500 [MHz])  
 X Acq Duration = 1.4548992 [s]  
 X Domain = 1H  
 X Freq = 500.15991521 [MHz]  
 X Offset = 6 [ppm]  
 X Points = 16384  
 X Prescans = 1  
 X Resolution = 0.68733284 [Hz]  
 X Sweep = 11.26126126 [kHz]  
 X Sweep Clipped = 9.00900901 [kHz]  
 Irr Domain = Proton  
 Irr Freq = 500.15991521 [MHz]  
 Irr Offset = 5.0 [ppm]  
 Tri Domain = Proton  
 Tri Freq = 500.15991521 [MHz]  
 Tri Offset = 5.0 [ppm]  
 Clipped = FALSE  
 Scans = 40  
 Total Scans = 40  
 Relaxation Delay = 5 [s]  
 Recvr Gain = 48  
 Temp Get = 20 [dC]  
 X 90 Width = 14.5 [us]  
 X Acq Time = 1.4548992 [s]  
 X Angle = 45 [deg]  
 X Atn = 4.9 [dB]  
 X Pulse = 7.25 [us]  
 Irr Mode = Off  
 Tri Mode = Off  
 Dante Presat = FALSE  
 Initial Wait = 1 [s]  
 Repetition Time = 6.4548992 [s]

3H-5F

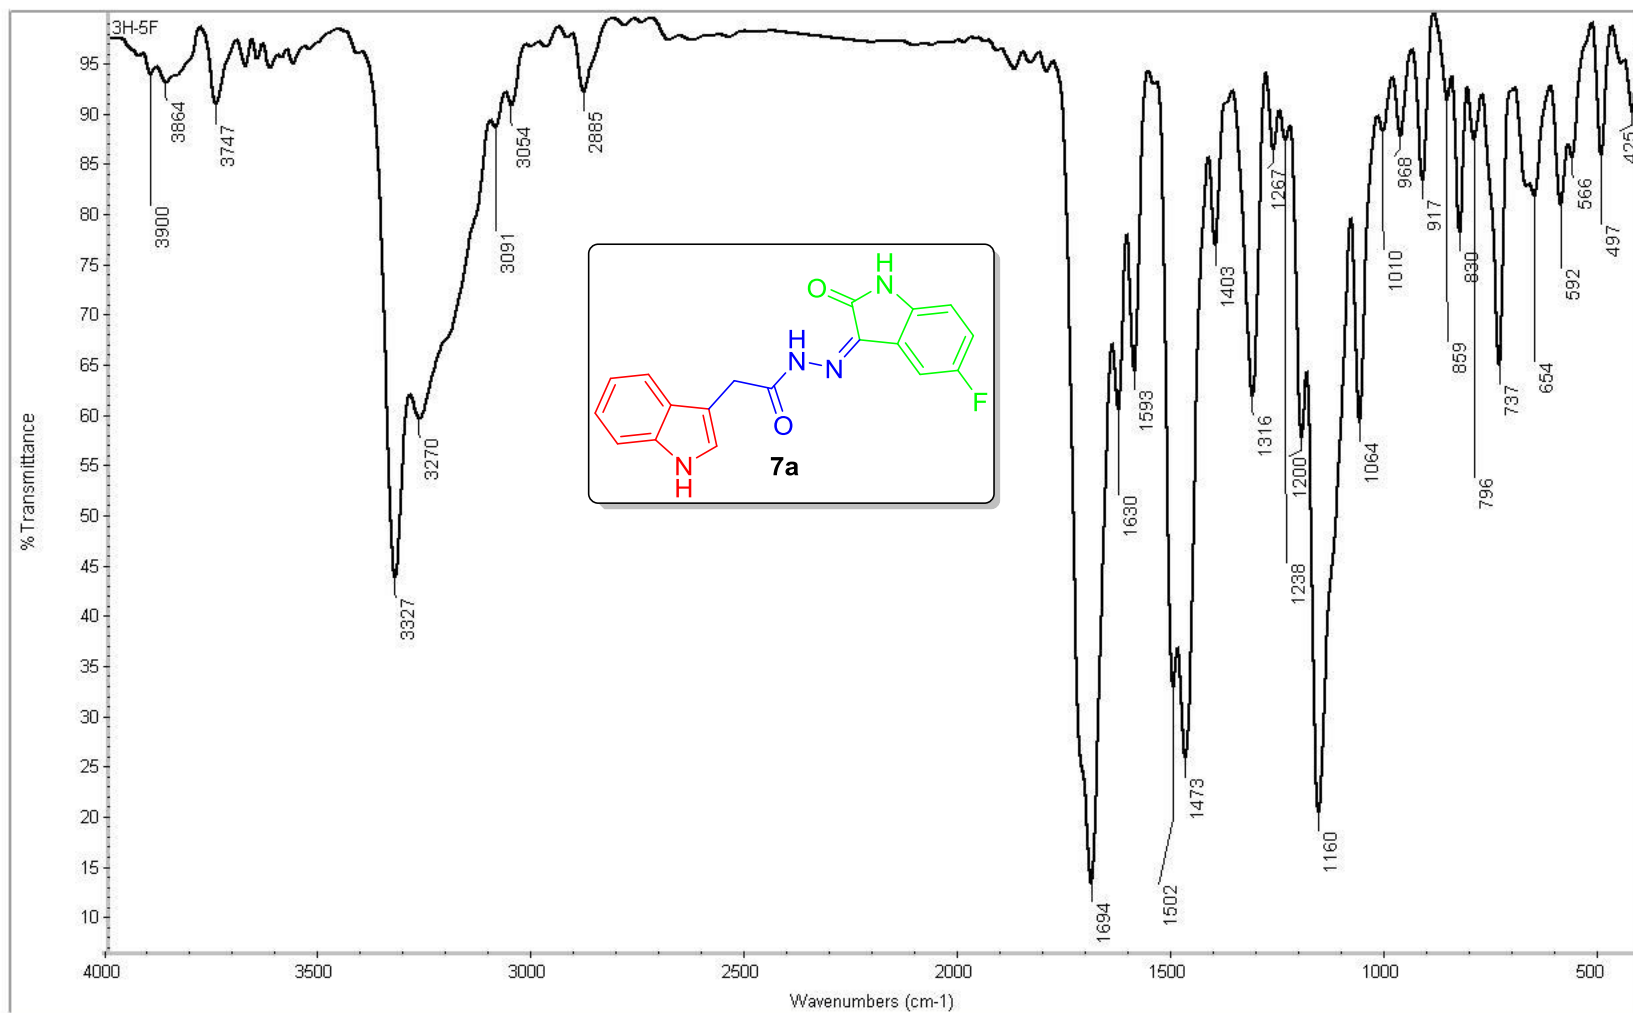

3H-5 CL

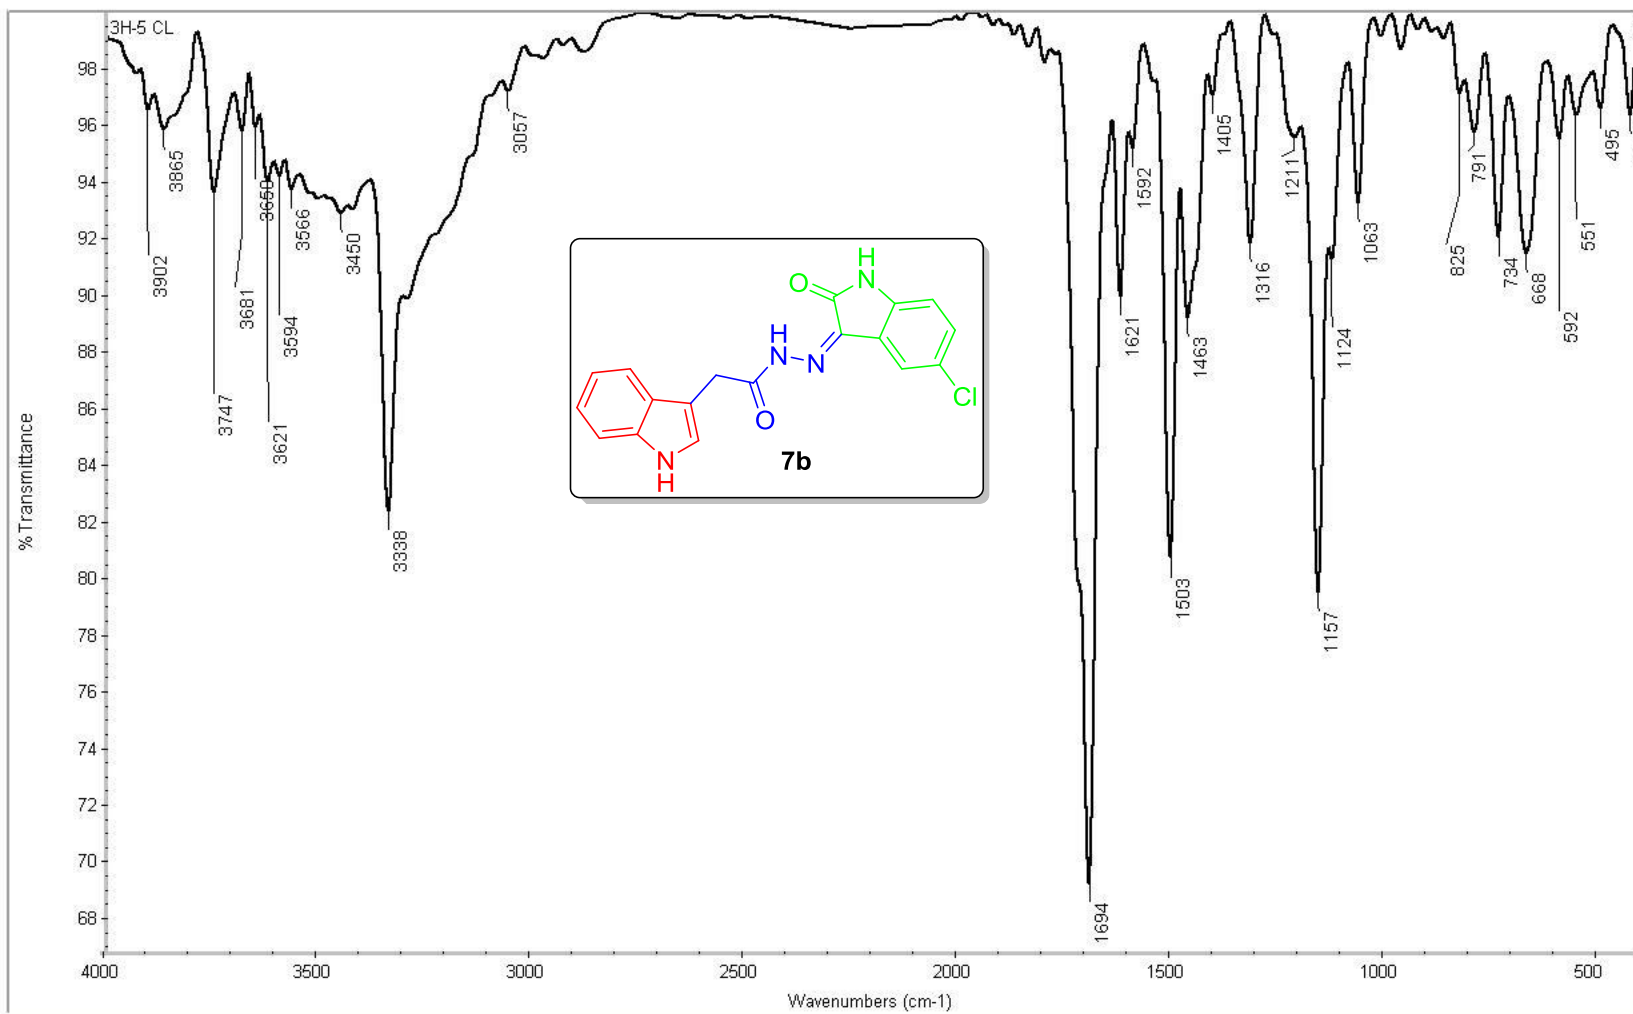

3H-5Me

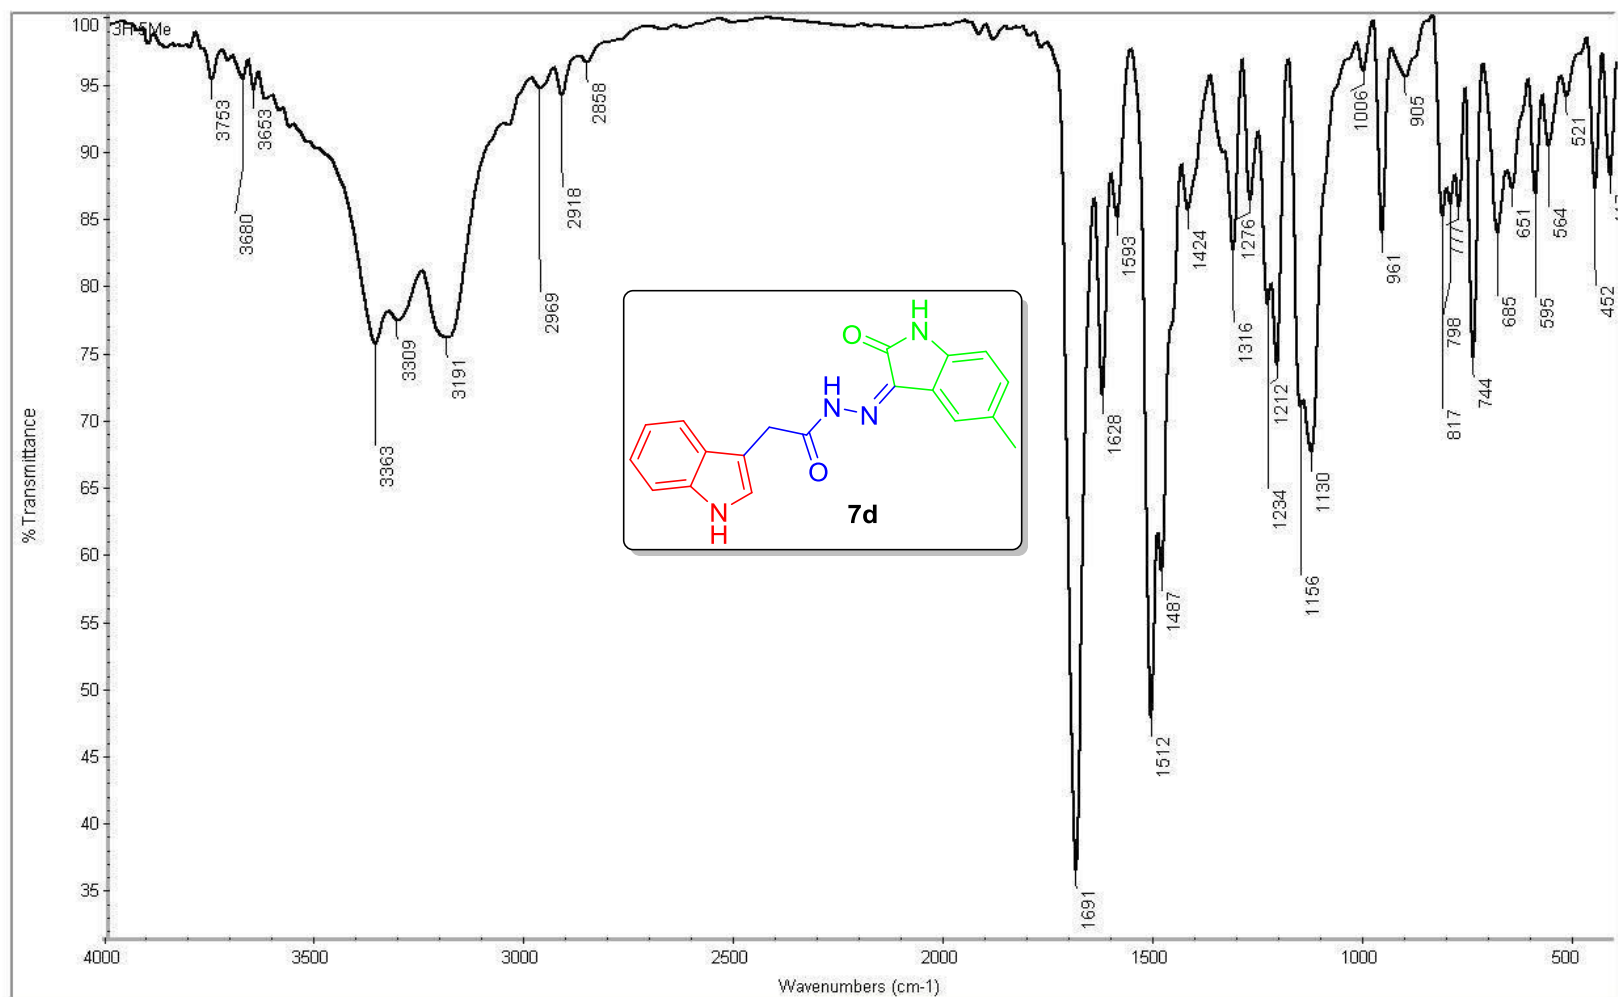

3H-5-7 dimethyl

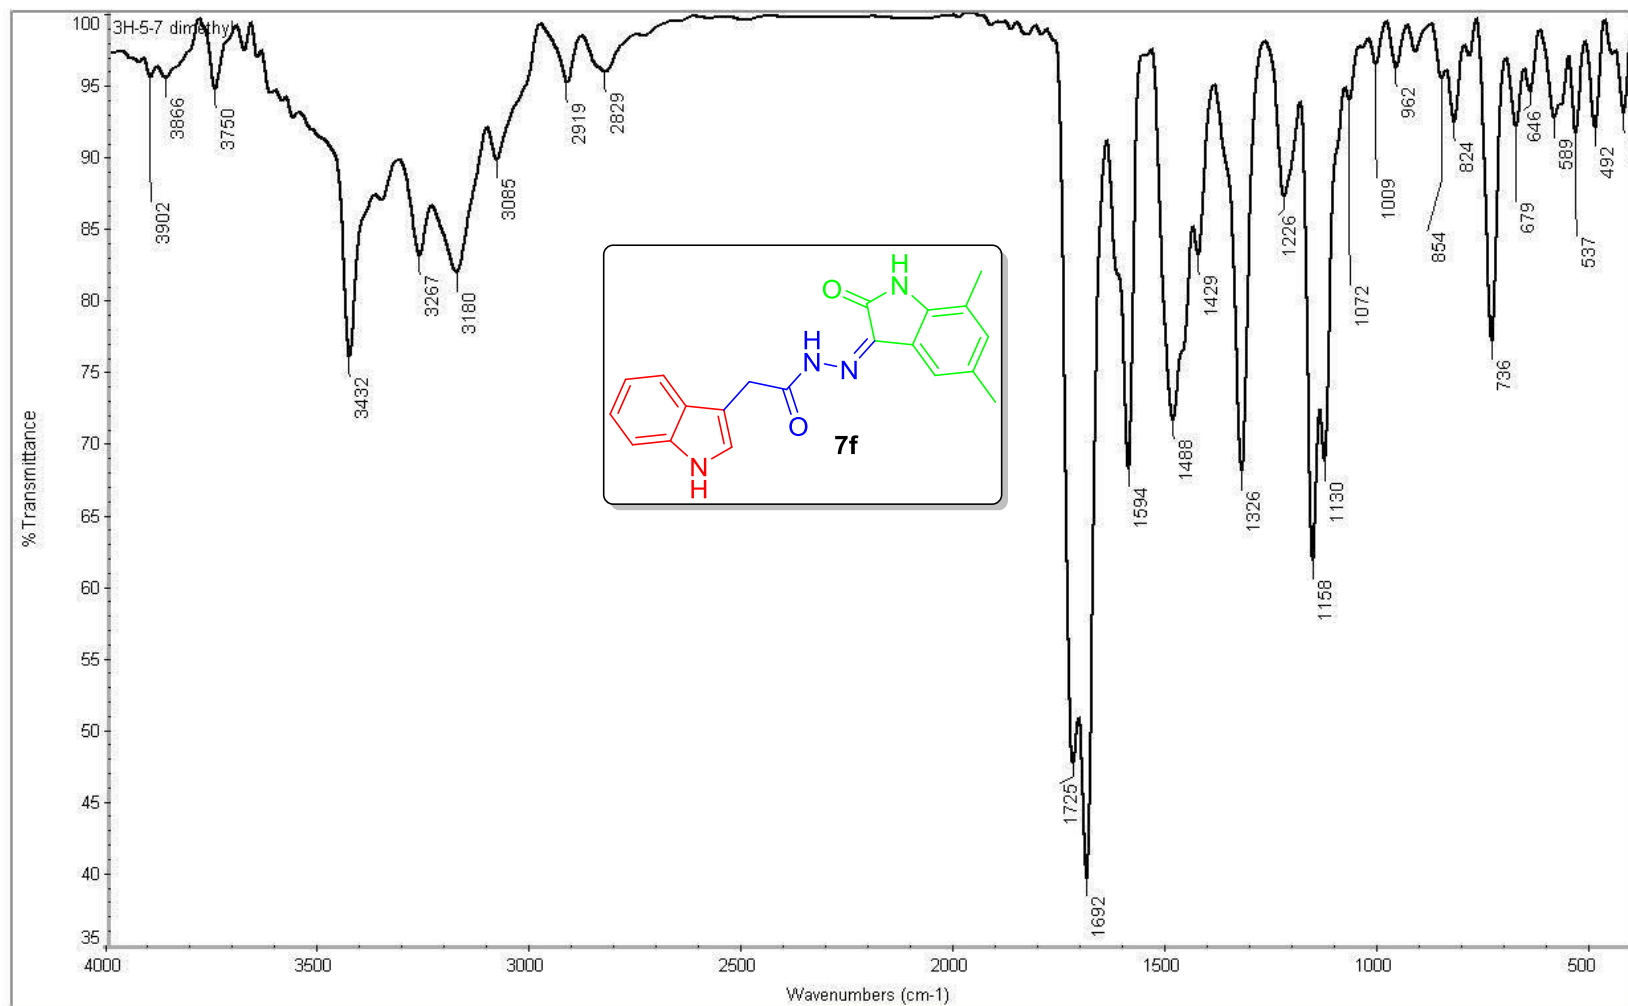



### 3H-iso bidyl

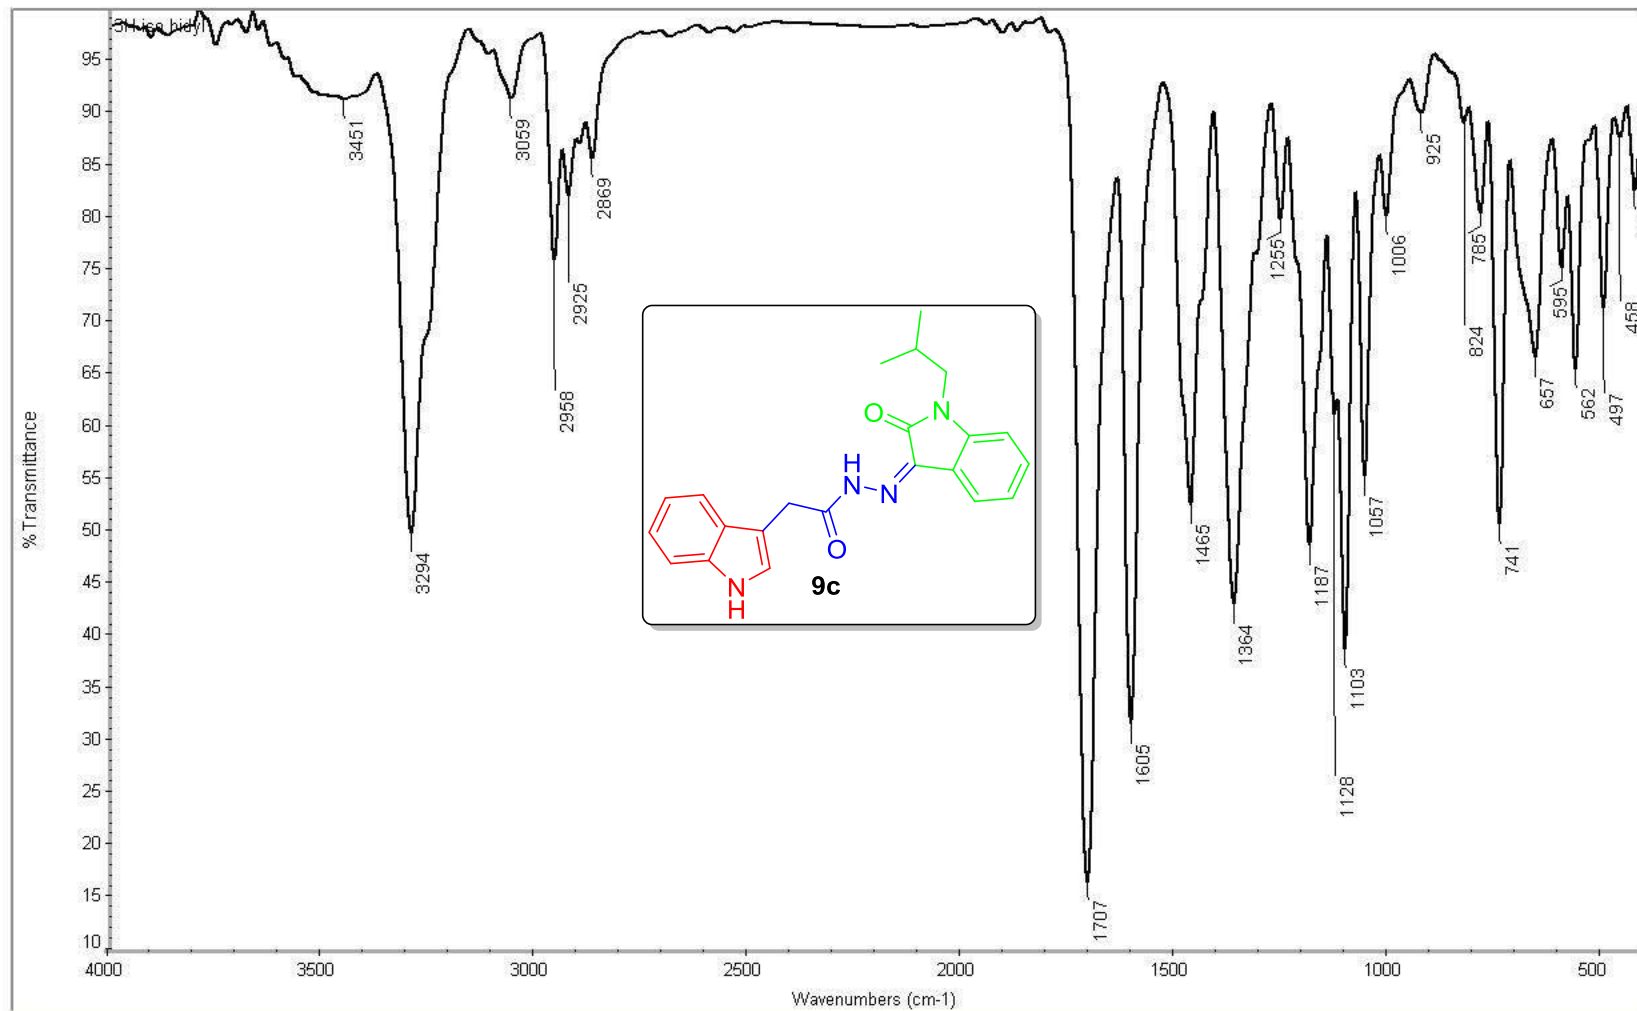

3H-NBZ

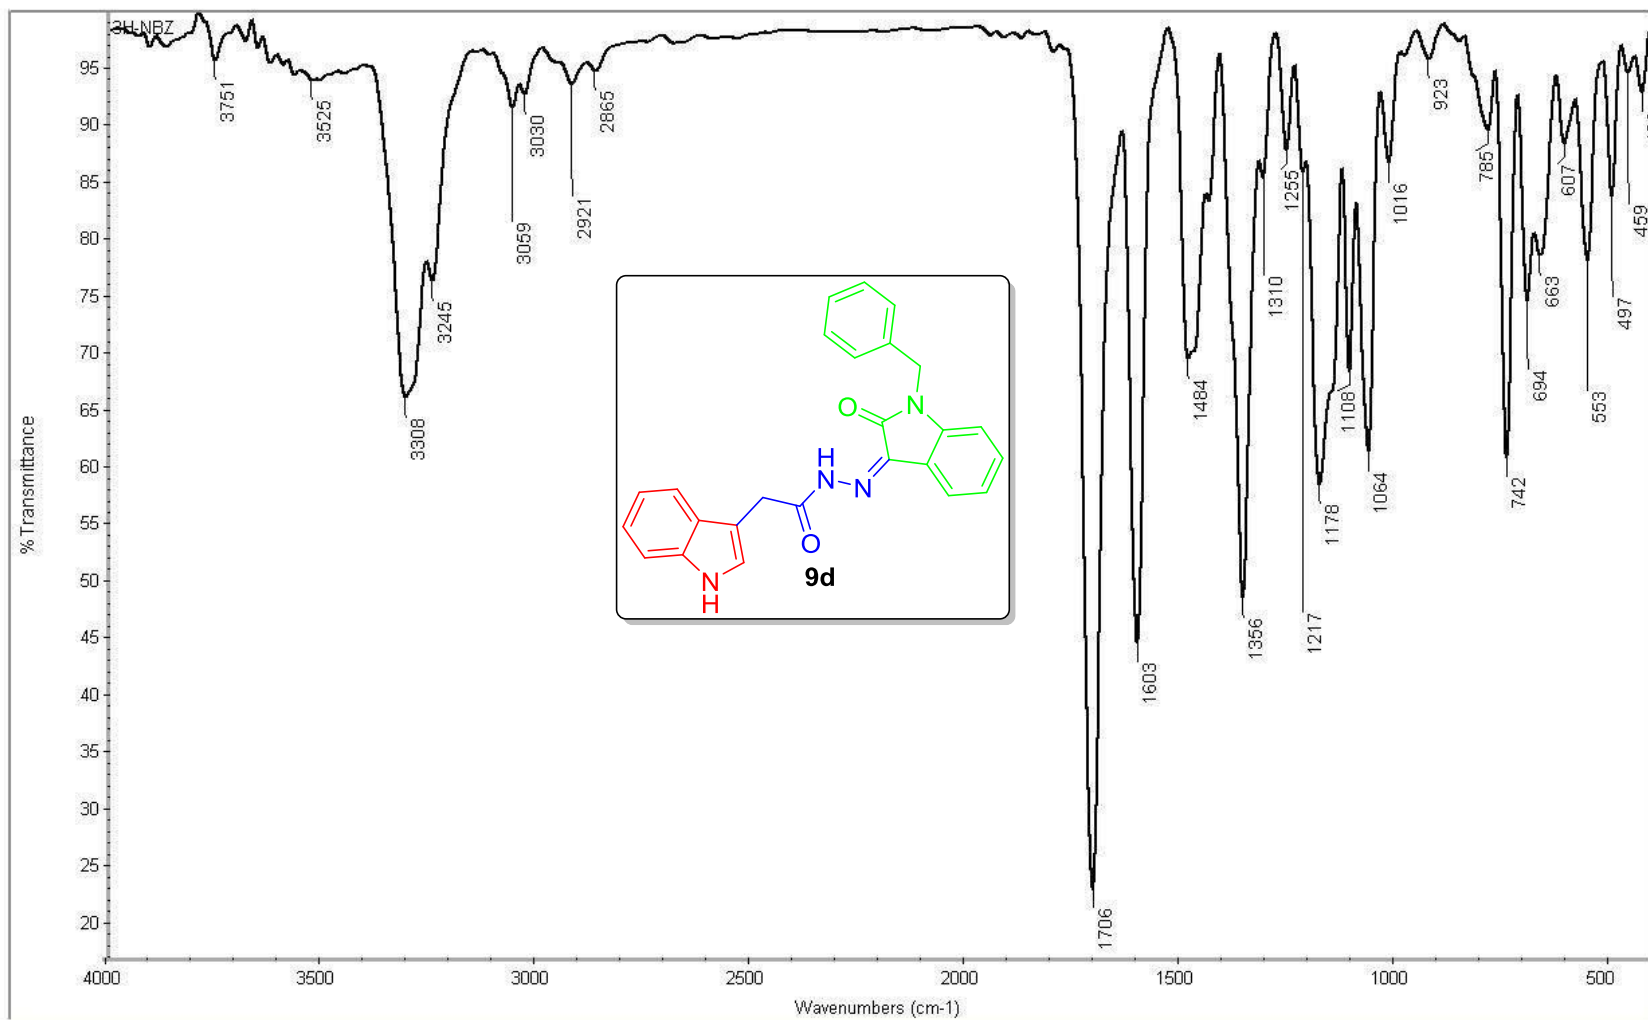

# 3H-NPCN

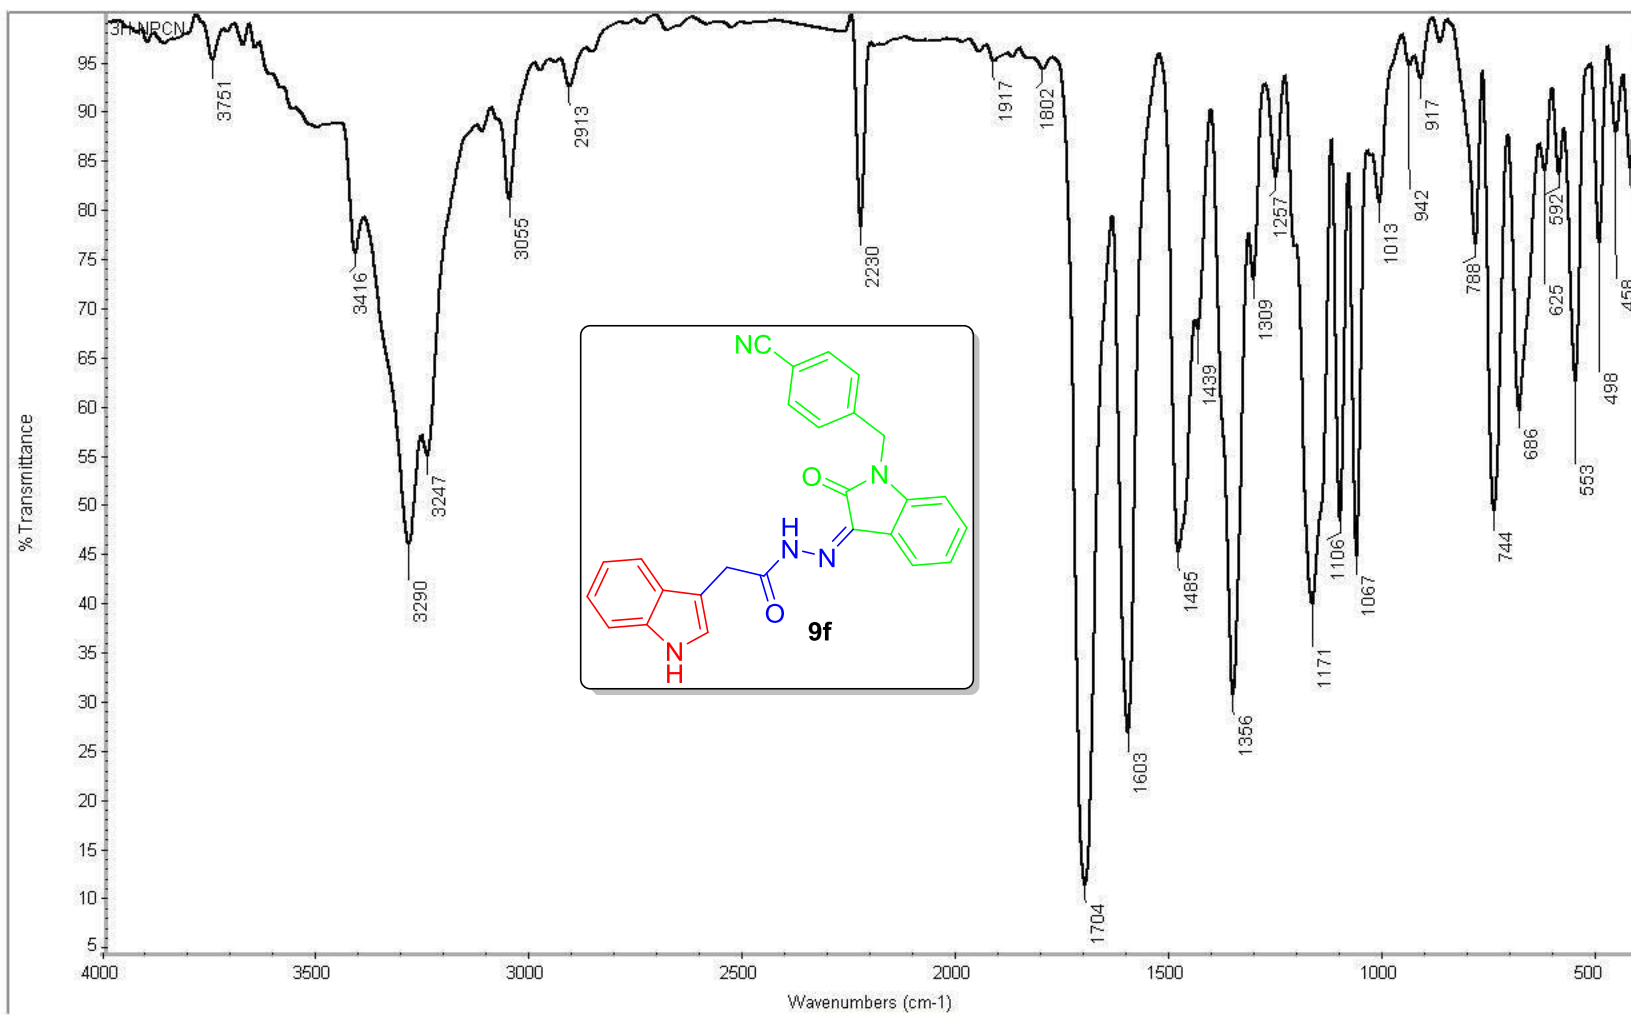

# 3H-Br NBZ

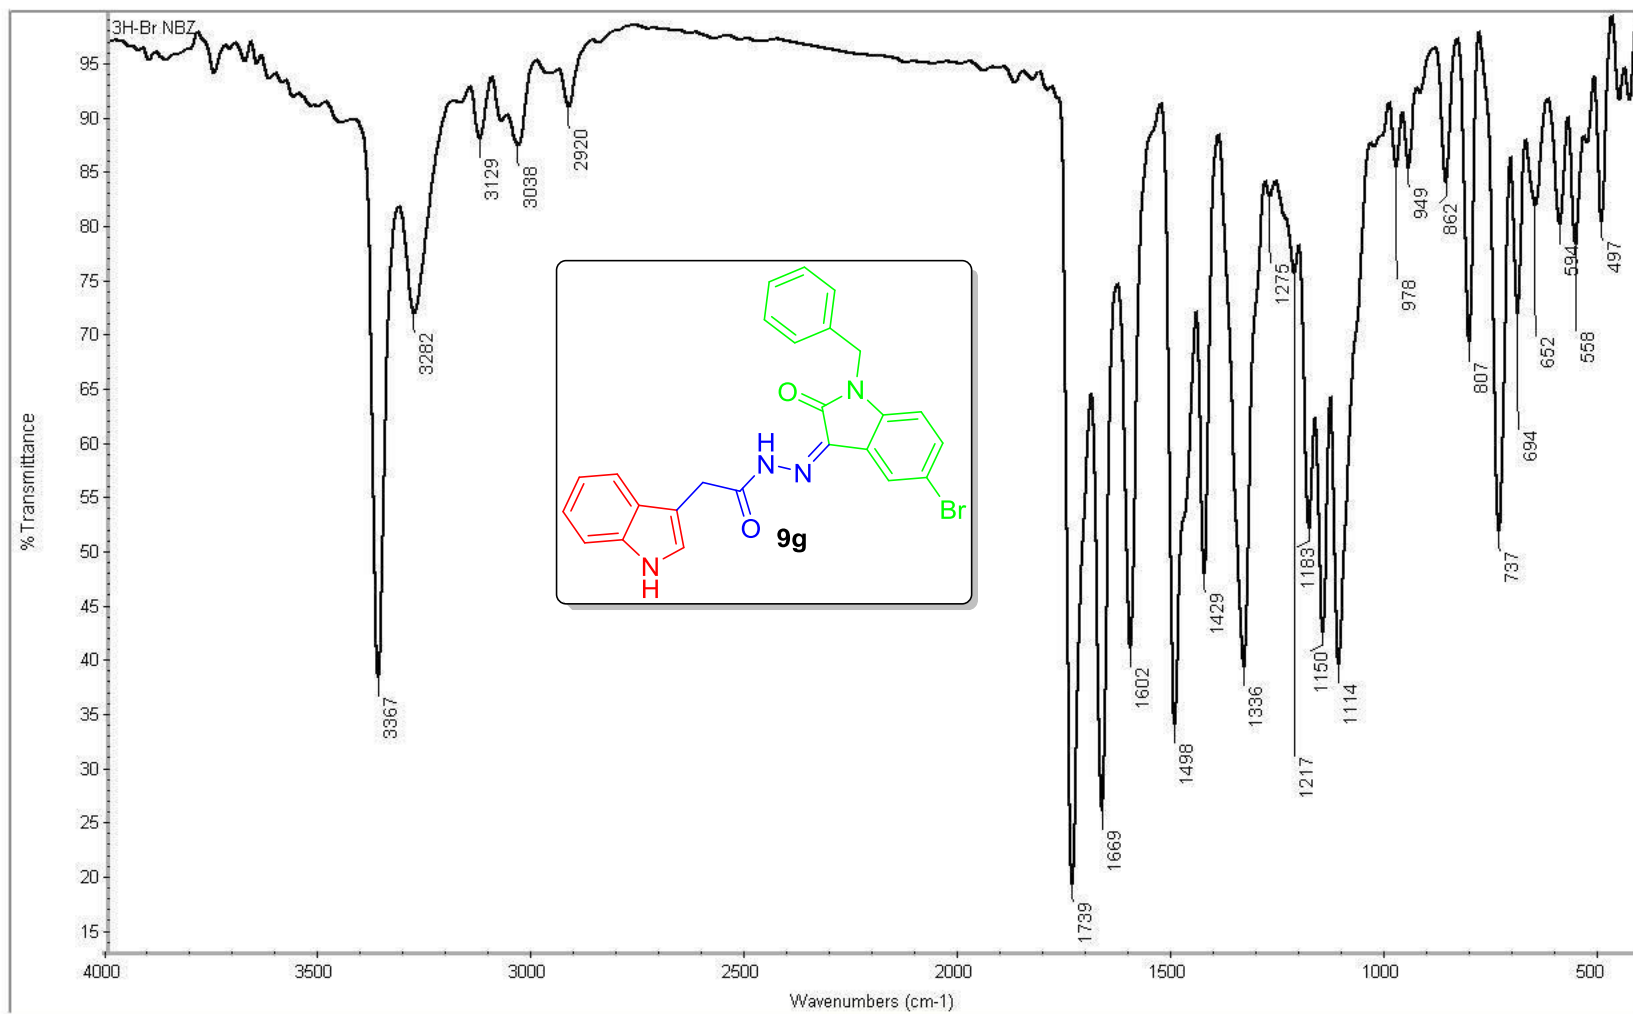

Supplement: s1 [file s1]
